# Supplementary material for: The impact of hsa-miR-1972 on the expression of von Willebrand factor in breast cancer progression regulation
Source: PeerJ journal article supplement (doi:10.7717/peerj.18476), 2024-11-08
Supplement: DataFig1to3.zip [file DataFig1to3.zip]

# NDUFB7 Survival Curve

Strata + NDUFB7\_group=high + NDUFB7\_group=low

Survival probability

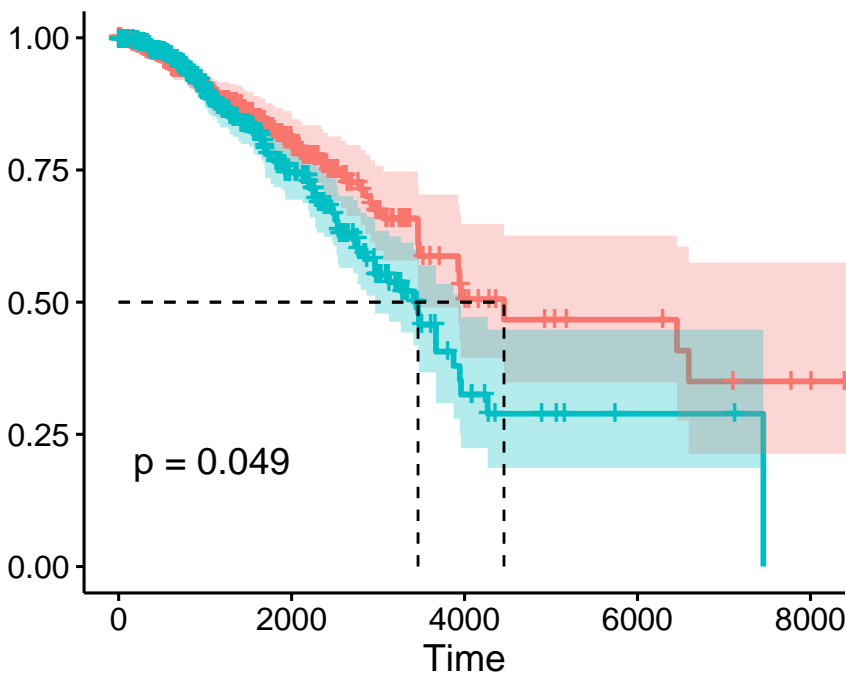

## NDUFB7 Survival Curve

Strata

|                   |      |      |      |      |      |
|-------------------|------|------|------|------|------|
| NDUFB7_group=high | 604  | 120  | 18   | 9    | 4    |
| NDUFB7_group=low  | 604  | 134  | 12   | 2    | 0    |
|                   | 0    | 2000 | 4000 | 6000 | 8000 |
|                   | Time |      |      |      |      |
