# Supplementary material for: The impact of hsa-miR-1972 on the expression of von Willebrand factor in breast cancer progression regulation
Source: PeerJ journal article supplement (doi:10.7717/peerj.18476), 2024-11-08
Supplement: DataFig1to3.zip [file DataFig1to3.zip]

# ATP5F1D Survival Curve

Strata ATP5F1D\_group=high ATP5F1D\_group=low

Survival probability

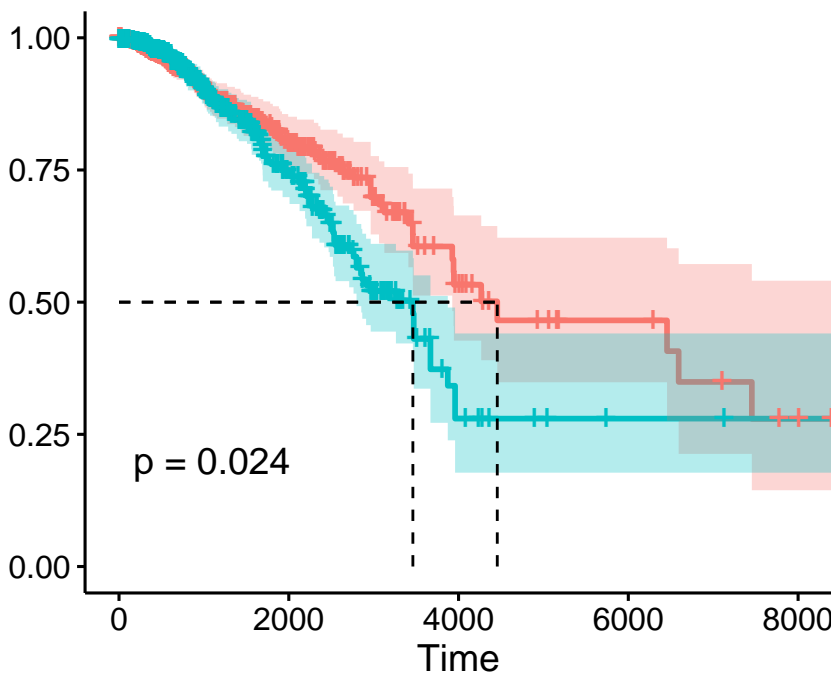

## ATP5F1D Survival Curve

Strata

|                    |      |      |      |      |      |
|--------------------|------|------|------|------|------|
| ATP5F1D_group=high | 604  | 124  | 21   | 9    | 3    |
| ATP5F1D_group=low  | 604  | 130  | 9    | 2    | 1    |
|                    | 0    | 2000 | 4000 | 6000 | 8000 |
|                    | Time |      |      |      |      |
