# Supplementary material for: The impact of hsa-miR-1972 on the expression of von Willebrand factor in breast cancer progression regulation
Source: PeerJ journal article supplement (doi:10.7717/peerj.18476), 2024-11-08

# MRPL20 Survival Curve

Strata MRPL20\_group=high MRPL20\_group=low

Survival probability

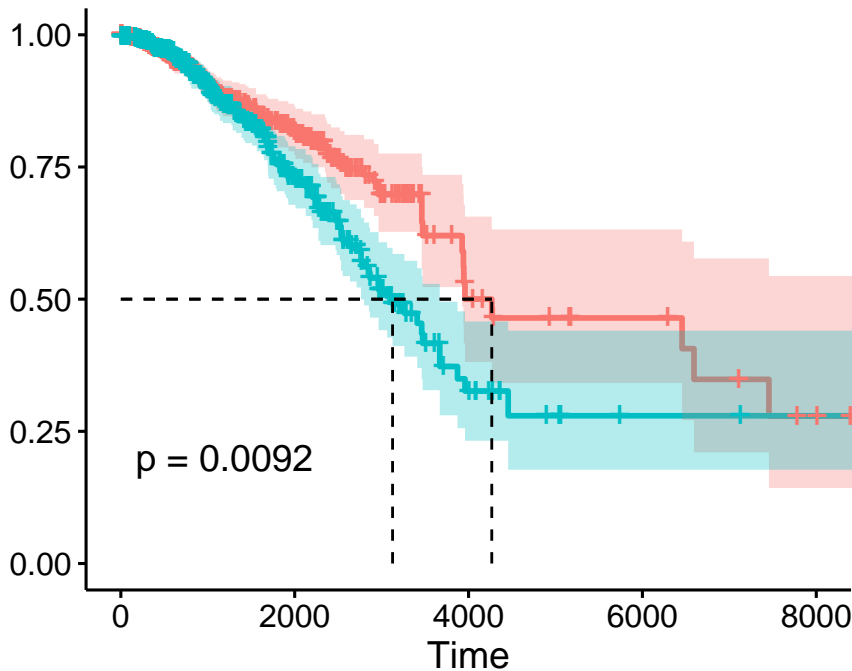

## MRPL20 Survival Curve

Strata

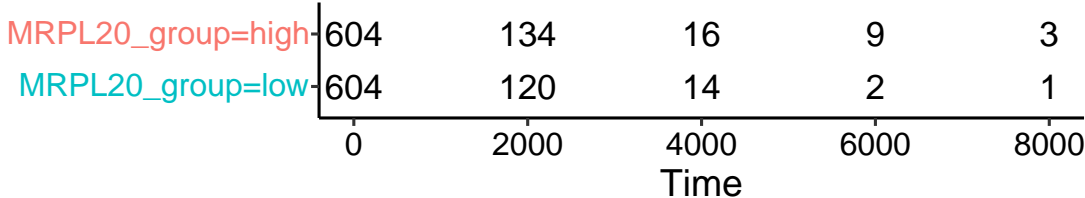

Supplement: DataFig1to3.zip [file DataFig1to3.zip]
