# Supplementary material for: The impact of hsa-miR-1972 on the expression of von Willebrand factor in breast cancer progression regulation
Source: PeerJ journal article supplement (doi:10.7717/peerj.18476), 2024-11-08
Supplement: DataFig1to3.zip [file DataFig1to3.zip]

# MRPL12 Survival Curve

Strata MRPL12\_group=high MRPL12\_group=low

Survival probability

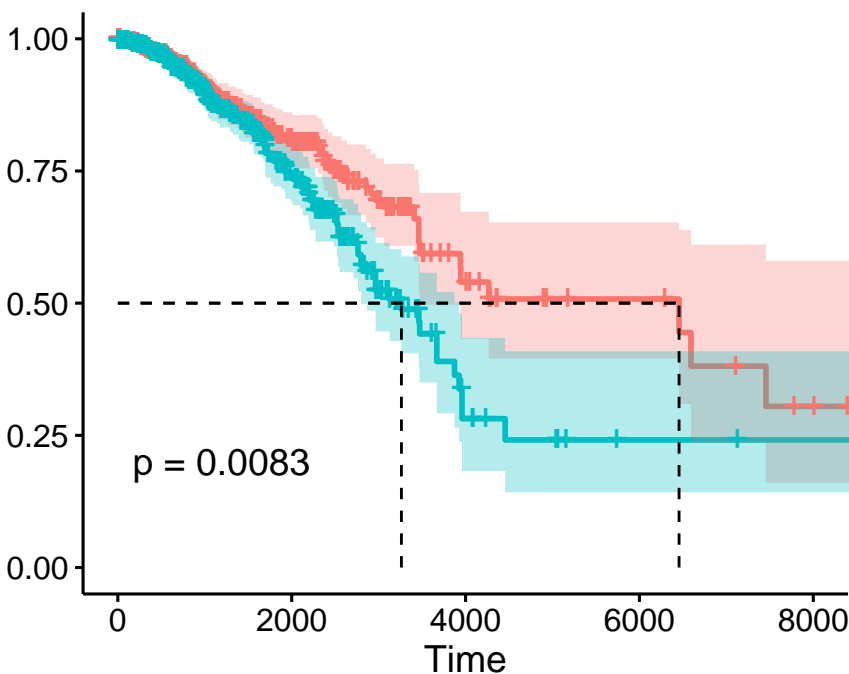

## MRPL12 Survival Curve

Strata

|                   |     |      |      |      |      |
|-------------------|-----|------|------|------|------|
| MRPL12_group=high | 604 | 119  | 20   | 9    | 3    |
| MRPL12_group=low  | 604 | 135  | 10   | 2    | 1    |
|                   | 0   | 2000 | 4000 | 6000 | 8000 |

Time
