# Supplementary material for: The impact of hsa-miR-1972 on the expression of von Willebrand factor in breast cancer progression regulation
Source: PeerJ journal article supplement (doi:10.7717/peerj.18476), 2024-11-08
Supplement: DataFig1to3.zip [file DataFig1to3.zip]

Module–trait relationships

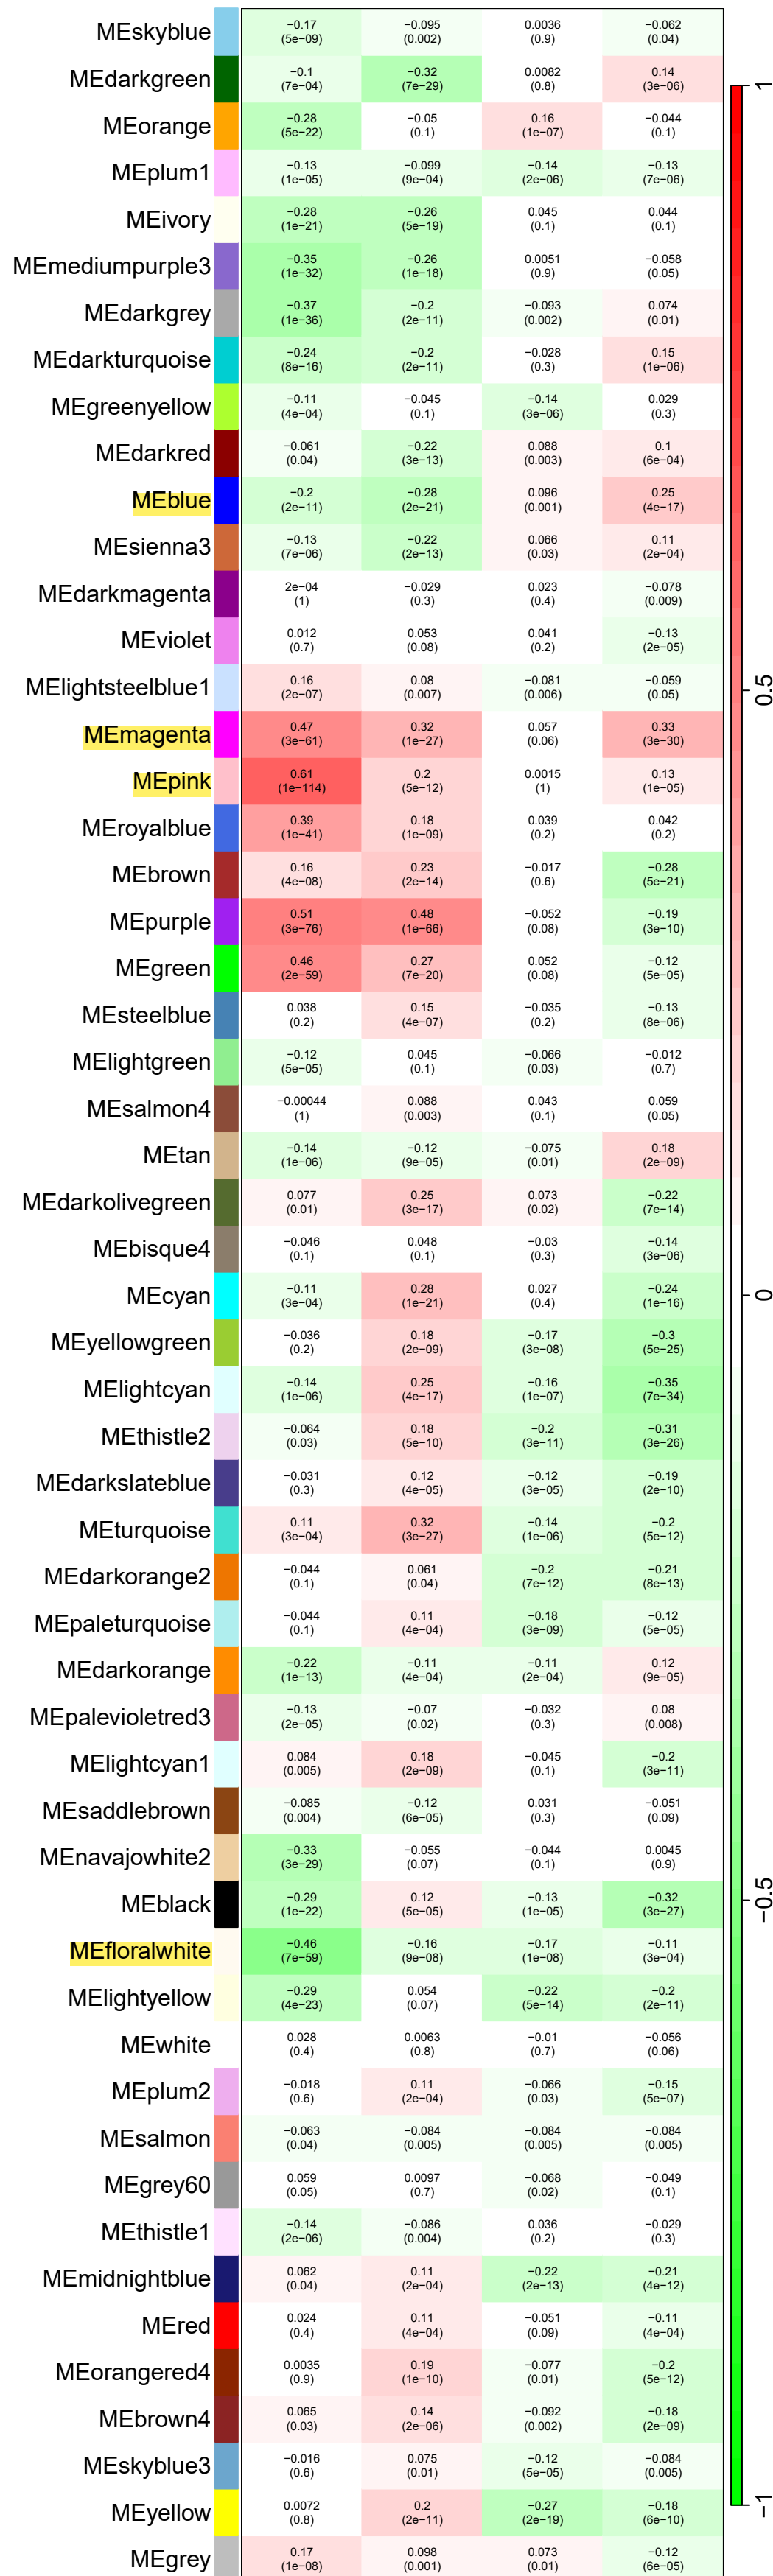

impaired cell migration

impaired cell migration with increased protrusive activity

increased cell migration and increased cell area

increased directional cell migration
