# Supplementary material for: The impact of hsa-miR-1972 on the expression of von Willebrand factor in breast cancer progression regulation
Source: PeerJ journal article supplement (doi:10.7717/peerj.18476), 2024-11-08
Supplement: DataFig1to3.zip [file DataFig1to3.zip]

**A****MRPL20 Survival Curve**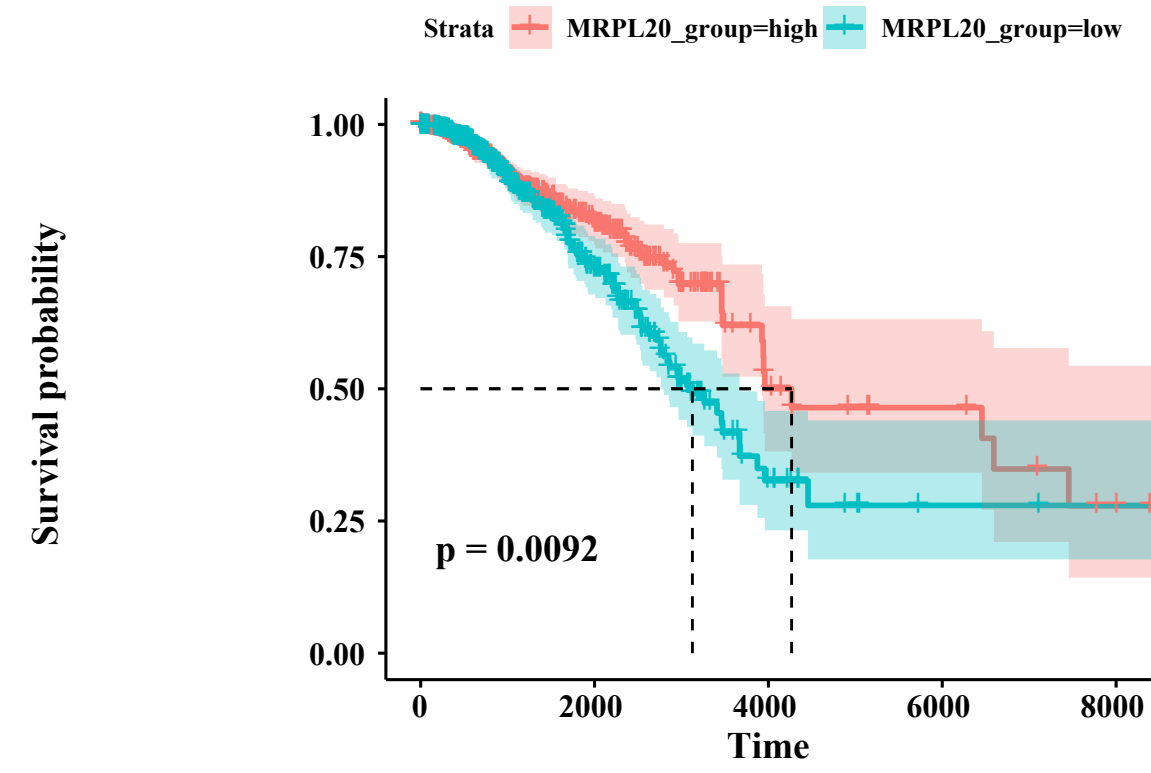**MRPL20 Survival Curve**

|        |                   |     |     |    |   |   |
|--------|-------------------|-----|-----|----|---|---|
| Strata | MRPL20_group=high | 604 | 134 | 16 | 9 | 3 |
|        | MRPL20_group=low  | 604 | 120 | 14 | 2 | 1 |

**B****MRPL12 Survival Curve**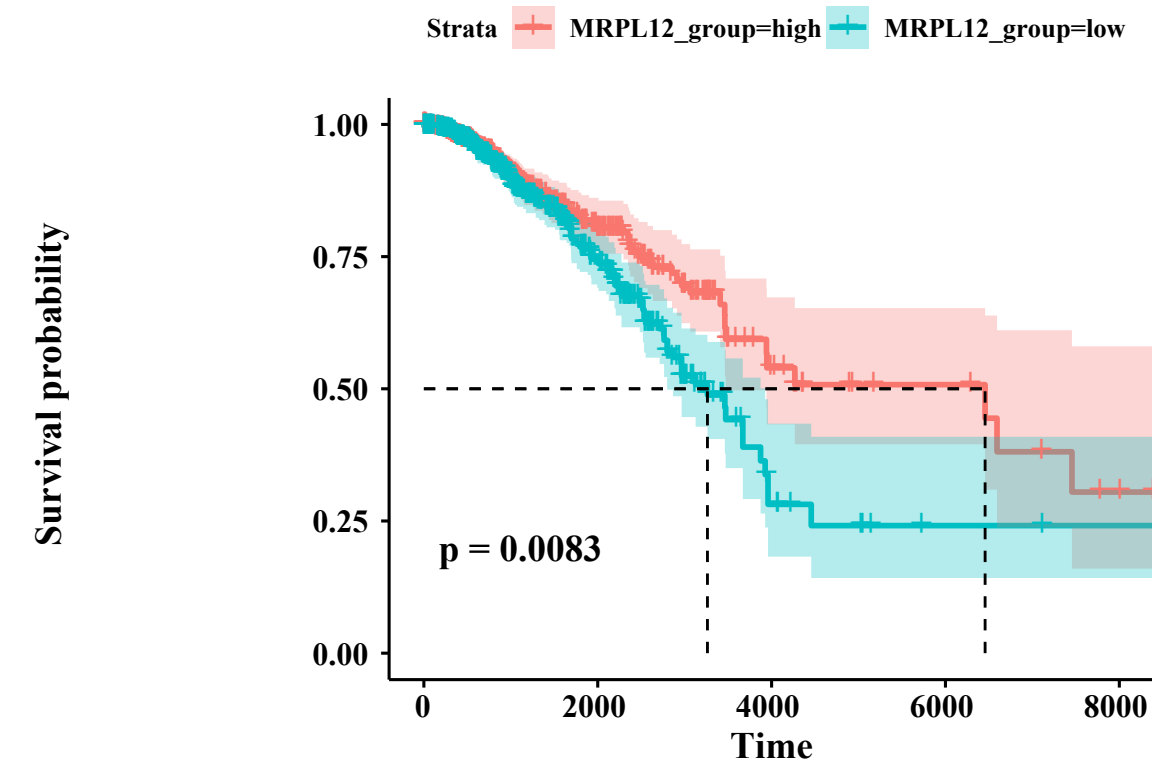**MRPL12 Survival Curve**

|        |                   |     |     |    |   |   |
|--------|-------------------|-----|-----|----|---|---|
| Strata | MRPL12_group=high | 604 | 119 | 20 | 9 | 3 |
|        | MRPL12_group=low  | 604 | 135 | 10 | 2 | 1 |

**C****AURKAIP1 Survival Curve**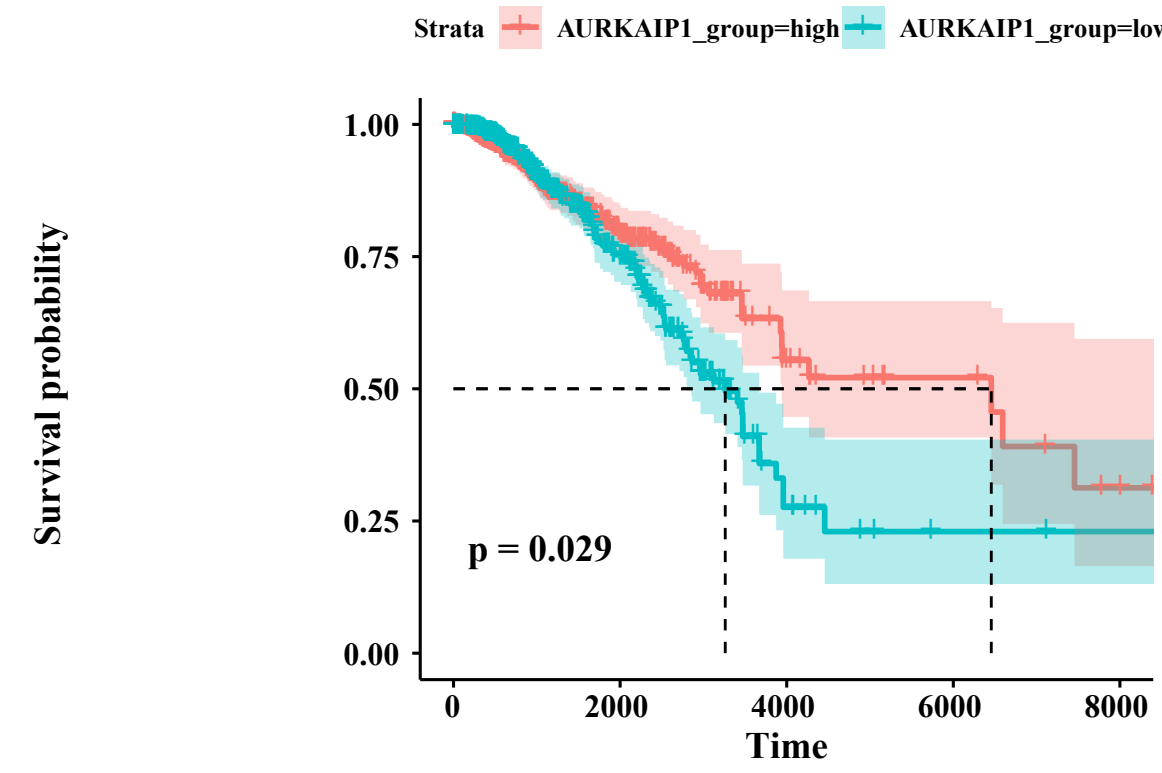**AURKAIP1 Survival Curve**

|        |                     |     |     |    |   |   |
|--------|---------------------|-----|-----|----|---|---|
| Strata | AURKAIP1_group=high | 604 | 121 | 20 | 9 | 3 |
|        | AURKAIP1_group=low  | 604 | 133 | 10 | 2 | 1 |

**D****NDUFB7 Survival Curve**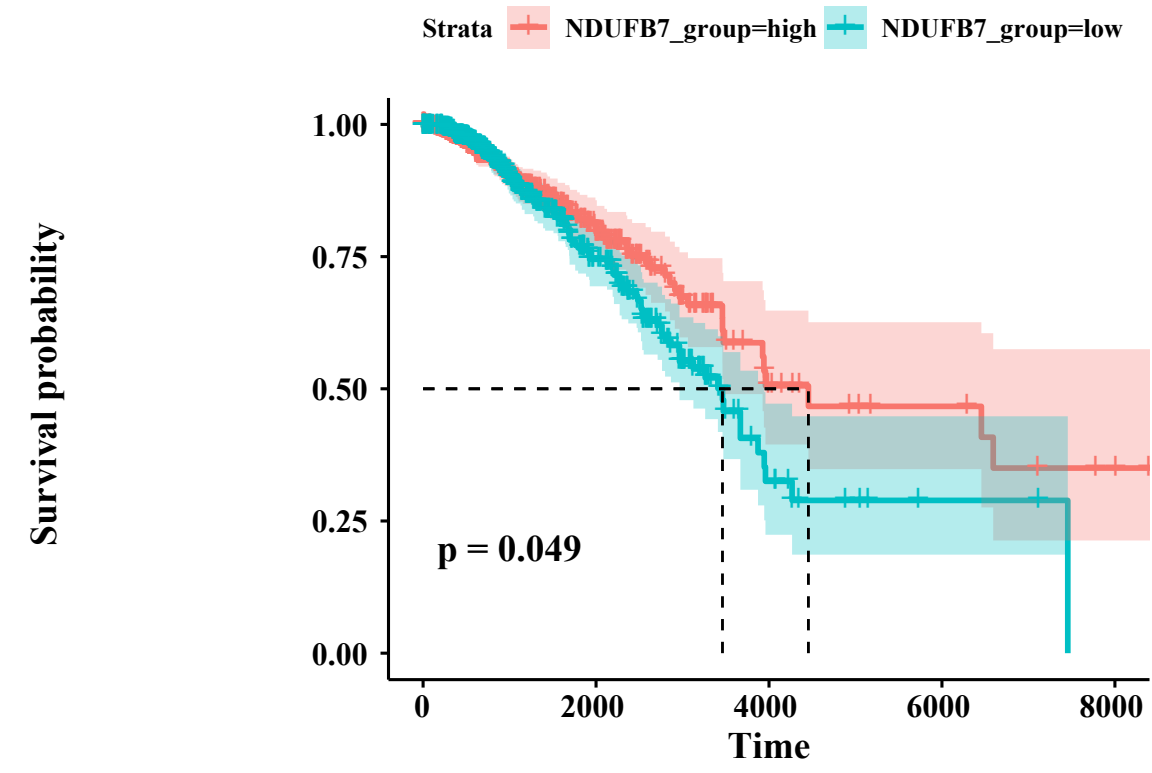**NDUFB7 Survival Curve**

|        |                   |     |     |    |   |   |
|--------|-------------------|-----|-----|----|---|---|
| Strata | NDUFB7_group=high | 604 | 120 | 18 | 9 | 4 |
|        | NDUFB7_group=low  | 604 | 134 | 12 | 2 | 0 |

**E****ATP5F1D Survival Curve**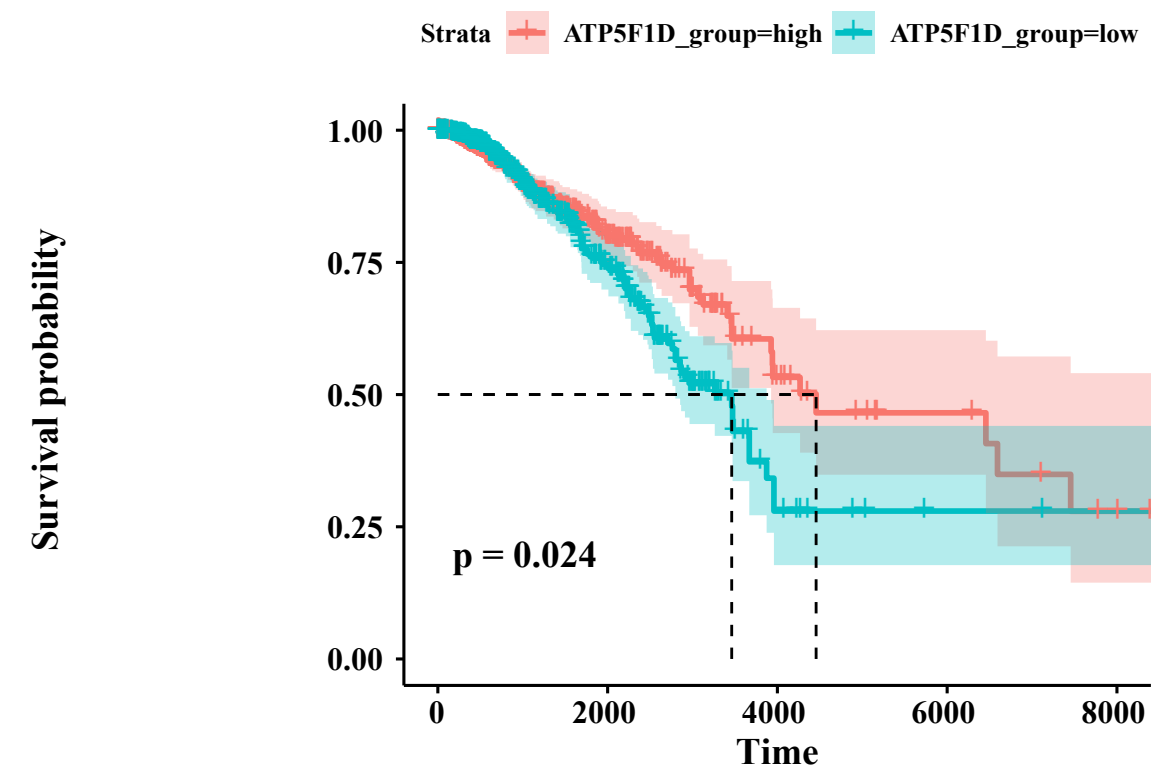**ATP5F1D Survival Curve**

|        |                    |     |     |    |   |   |
|--------|--------------------|-----|-----|----|---|---|
| Strata | ATP5F1D_group=high | 604 | 124 | 21 | 9 | 3 |
|        | ATP5F1D_group=low  | 604 | 130 | 9  | 2 | 1 |

**F****COL4A1 Survival Curve**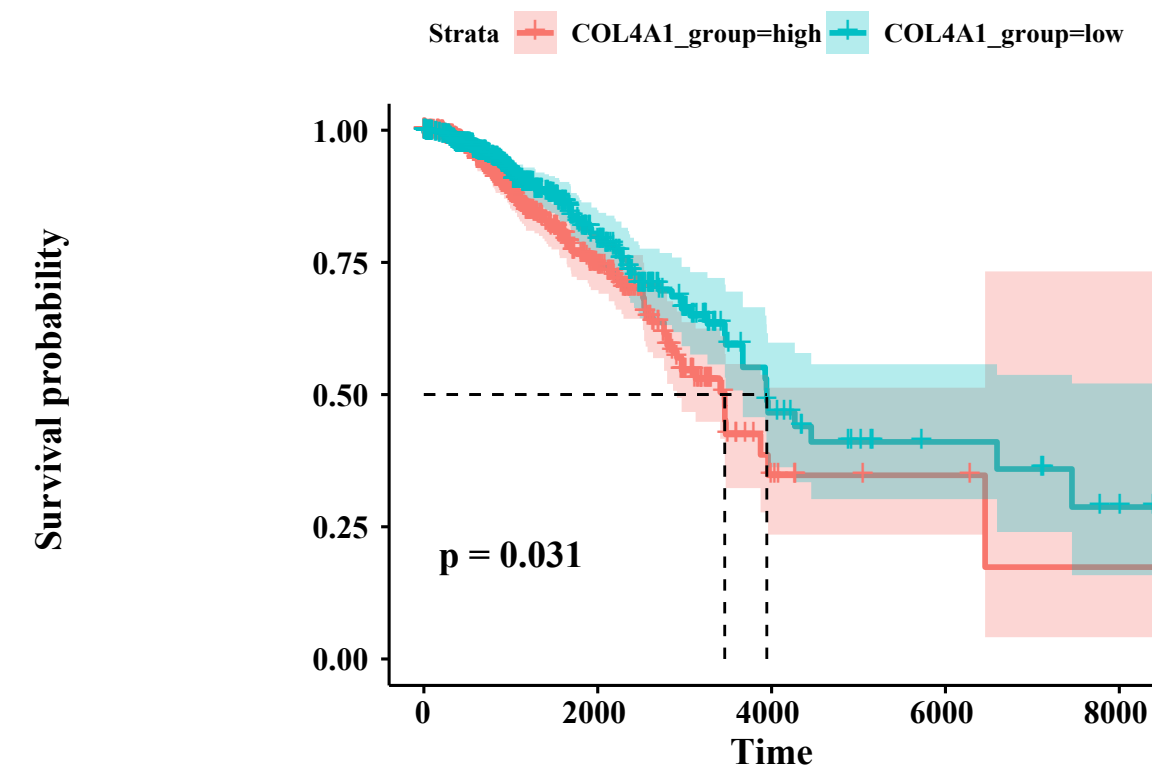**COL4A1 Survival Curve**

|        |                   |     |     |    |   |   |
|--------|-------------------|-----|-----|----|---|---|
| Strata | COL4A1_group=high | 604 | 124 | 9  | 3 | 1 |
|        | COL4A1_group=low  | 604 | 130 | 21 | 8 | 3 |

**G****BGN Survival Curve**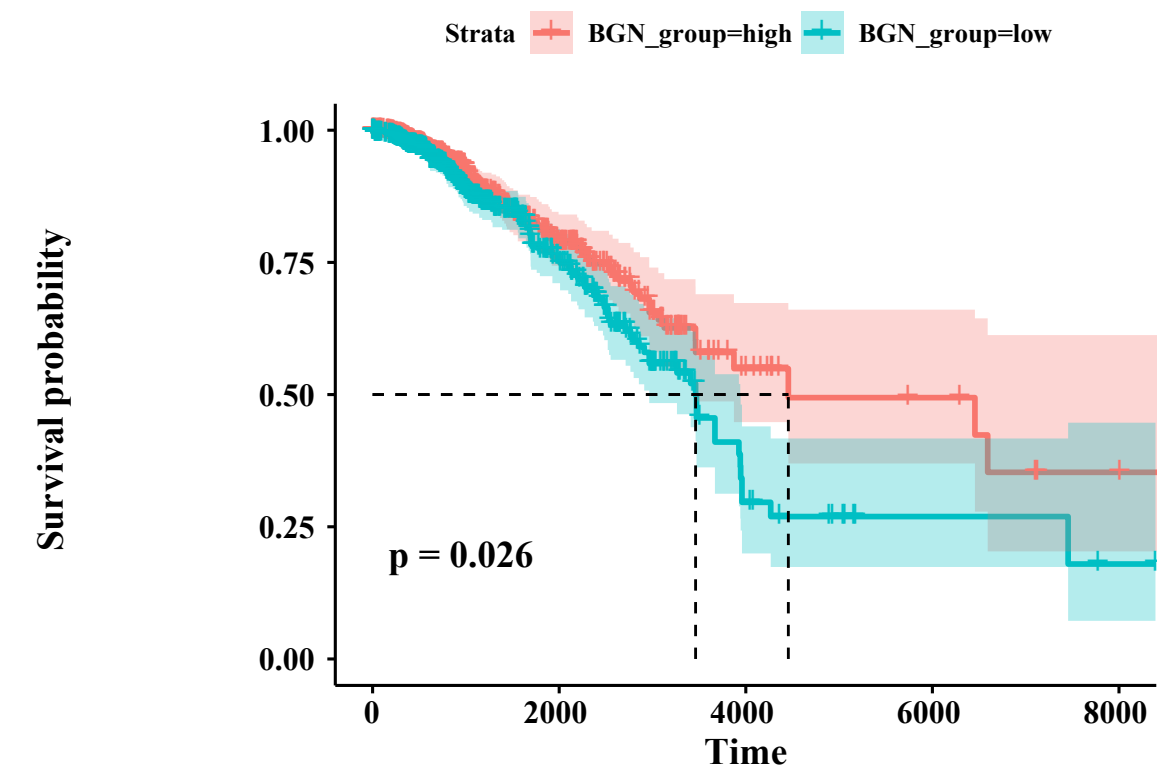**BGN Survival Curve**

|        |                |     |     |    |   |   |
|--------|----------------|-----|-----|----|---|---|
| Strata | BGN_group=high | 604 | 126 | 17 | 8 | 3 |
|        | BGN_group=low  | 604 | 128 | 13 | 3 | 1 |

**H****VWF Survival Curve**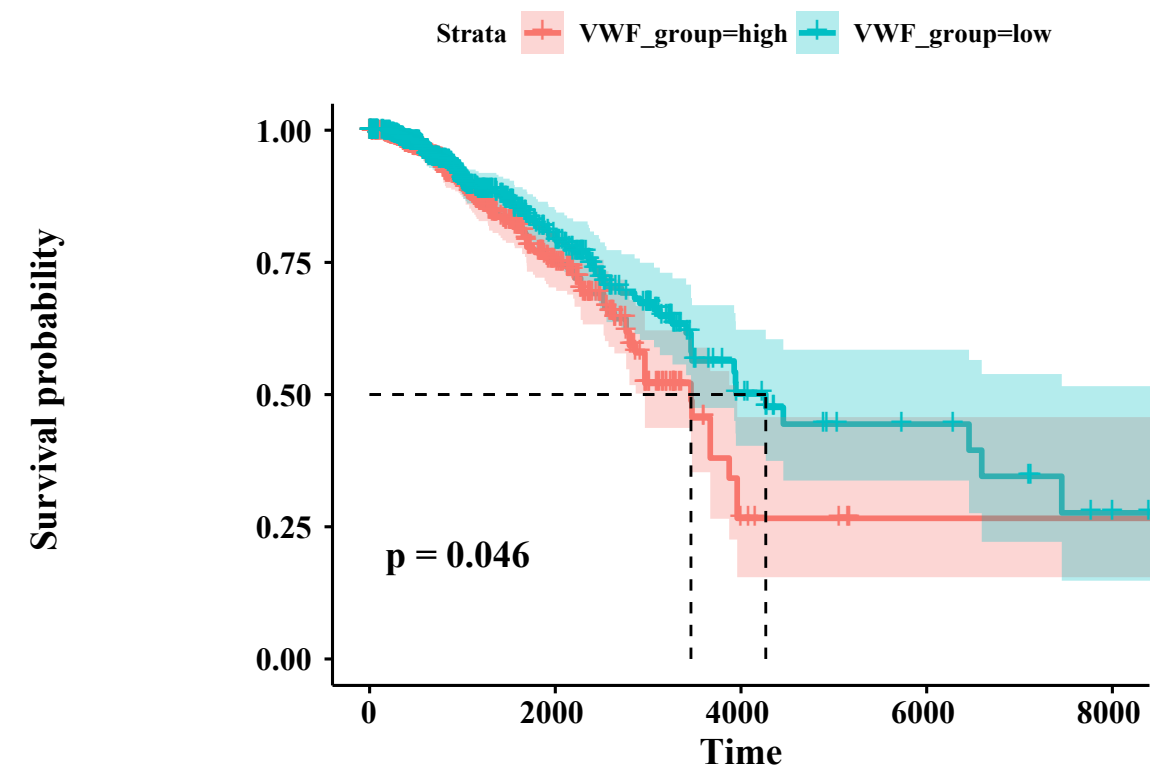**VWF Survival Curve**

|        |                |     |     |    |    |   |
|--------|----------------|-----|-----|----|----|---|
| Strata | VWF_group=high | 604 | 130 | 7  | 1  | 1 |
|        | VWF_group=low  | 604 | 124 | 23 | 10 | 3 |
