# Supplementary material for: The impact of hsa-miR-1972 on the expression of von Willebrand factor in breast cancer progression regulation
Source: PeerJ journal article supplement (doi:10.7717/peerj.18476), 2024-11-08
Supplement: DataFig1to3.zip [file DataFig1to3.zip]

# BGN Survival Curve

Strata + BGN\_group=high + BGN\_group=low

Survival probability

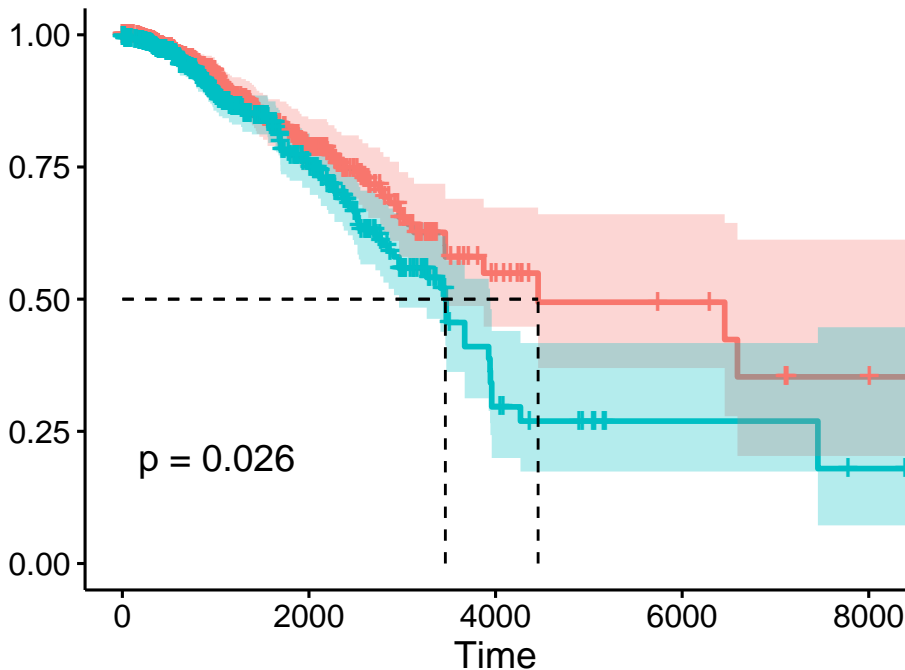

## BGN Survival Curve

Strata

BGN\_group=high  
BGN\_group=low

|      |      |      |      |      |
|------|------|------|------|------|
| 604  | 126  | 17   | 8    | 3    |
| 604  | 128  | 13   | 3    | 1    |
| 0    | 2000 | 4000 | 6000 | 8000 |
| Time |      |      |      |      |
