# Supplementary material for: The impact of hsa-miR-1972 on the expression of von Willebrand factor in breast cancer progression regulation
Source: PeerJ journal article supplement (doi:10.7717/peerj.18476), 2024-11-08

# VWF Survival Curve

Strata VWF\_group=high VWF\_group=low

Survival probability

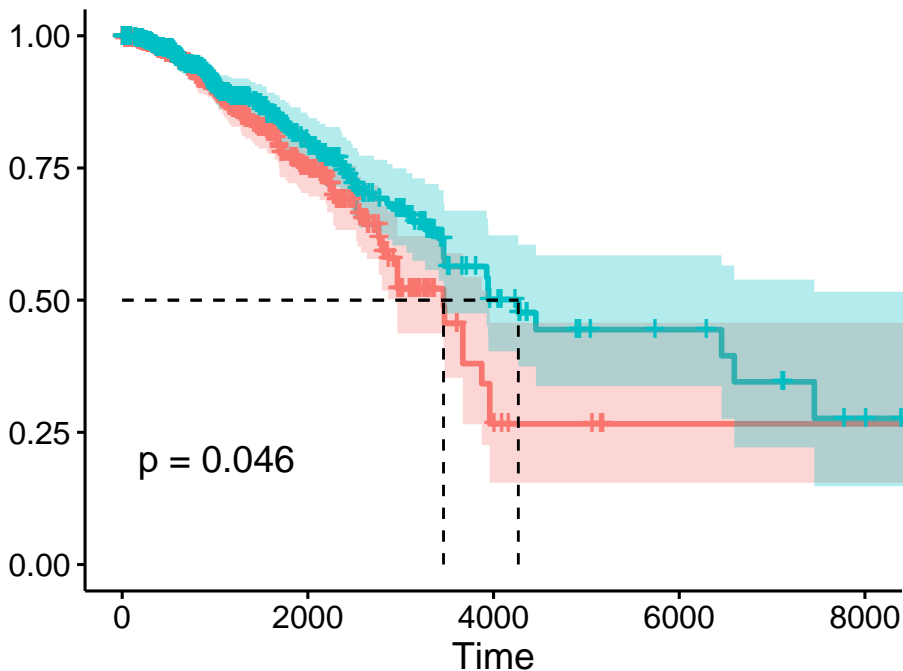

## VWF Survival Curve

Strata

VWF\_group=high

VWF\_group=low

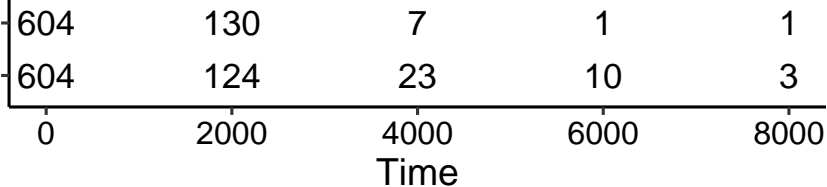

Supplement: DataFig1to3.zip [file DataFig1to3.zip]
