# Supplementary material for: The impact of hsa-miR-1972 on the expression of von Willebrand factor in breast cancer progression regulation
Source: PeerJ journal article supplement (doi:10.7717/peerj.18476), 2024-11-08
Supplement: Figure_4.zip [file Figure_4.zip]

## Sheet: Fig 4A, B
MCF7
ITGB8BP			MAP2K1			NEK1			SHC1			CDH1			MMP9
miR-NC	miR-mimic		miR-NC	miR-mimic		miR-NC	miR-mimic		miR-NC	miR-mimic		miR-NC	miR-mimic		miR-NC	miR-mimic
0	-0.09		0	1.47		0	2.4		0	1.58		0	0.92		0	3.18
0.1	1.03		0.05	1.44		0.06	2.16		-0.05	0.73		0.08	-0.13		0.08	2.95
0.07	0.8		0.3	2.14		-0.16	2.35		-0.22	1.42		-0.02	0.73		-0.09	2.83
MDA-MB-231
ITGB8BP			MAP2K1			NEK1			SHC1			CDH1			MMP9
miR-NC	miR-mimic		miR-NC	miR-mimic		miR-NC	miR-mimic		miR-NC	miR-mimic		miR-NC	miR-mimic		miR-NC	miR-mimic
0	1.89		0	0.53		0	1.6		0	0.67		0	2.81		0	2.5
-0.17	1.05		-0.16	0.01		0.29	1.78		0.06	0.72		0.05	2.02		0.01	1.95
0.07	1.08		0.36	-0.45		-0.13	1.31		-0.15	0.51		0.19	2.46		-0.24	2.05
MCF7
ITGB8BP			MAP2K1			NEK1			SHC1			CDH1			MMP9
miR-NC	miR-mimic		miR-NC	miR-mimic		miR-NC	miR-mimic		miR-NC	miR-mimic		miR-NC	miR-mimic		miR-NC	miR-mimic
1	1.06437		1	0.360982		1	0.189465		1	0.334482		1	0.528509		1	0.110338
0.933033	0.48971		0.965936	0.368567		0.959264	0.223756		1.03526	0.602904		0.946058	1.09429		0.946058	0.129408
0.952638	0.574349		0.812252	0.22688		1.11729	0.196146		1.16473	0.373712		1.01396	0.602904		1.06437	0.140632
MDA-MB-231
ITGB8BP			MAP2K1			NEK1			SHC1			CDH1			MMP9
miR-NC	miR-mimic		miR-NC	miR-mimic		miR-NC	miR-mimic		miR-NC	miR-mimic		miR-NC	miR-mimic		miR-NC	miR-mimic
1	0.269807		1	0.692555		1	0.329877		1	0.628507		1	0.142595		1	0.176777
1.12506	0.482968		1.11729	0.993092		0.817902	0.291183		0.959264	0.607097		0.965936	0.246558		0.993092	0.258816
0.952638	0.473029		0.779165	1.36604		1.09429	0.403321		1.10957	0.702222		0.876606	0.181747		1.18099	0.241484
