# Supplementary material for: The impact of hsa-miR-1972 on the expression of von Willebrand factor in breast cancer progression regulation
Source: PeerJ journal article supplement (doi:10.7717/peerj.18476), 2024-11-08
Supplement: Figure_7.zip [file Figure_7.zip]

## Sheet: Fig7B_WB
miR-NC	miR-mimic
0.654	0.408
0.547	0.372
0.501	0.235

## Sheet: Fig7C_LUCI
	miR-NC			miR-mimic
VWF-WT	0	0.17	-0.28	1.87	1.17	0.85
VWF-MUT	0.04	0.11	-0.19	0.16	0.16	0.03
	miR-NC			miR-mimic
VWF-WT	1	0.888843	1.21419	0.273573	0.444421	0.554785
VWF-MUT	0.972655	0.926588	1.14076	0.895025	0.895025	0.97942

## Sheet: Fig7D_mRNA stability
	miR-NC			miR-mimic
0	0	0.07	-0.17	0.01	0.14	0.07
2	0.28	0.32	0.16	0.34	0.42	0.47
4	0.51	0.69	0.65	1.07	0.96	1.16
6	0.87	0.85	0.73	1.98	1.49	1.54
8	0.99	0.87	0.95	2.75	2.55	2.89
	miR-NC			miR-mimic
0	1	0.952638	1.12506	0.993092	0.907519	0.952638
2	0.823591	0.80107	0.895025	0.790041	0.747425	0.721965
4	0.702222	0.619854	0.63728	0.476319	0.514057	0.447513
6	0.547147	0.554785	0.602904	0.25349	0.356013	0.343885
8	0.503478	0.547147	0.517632	0.148651	0.170755	0.134904

## Sheet: Fig7E
	miR-NC			miR-mimic
MCF-7	0	-0.15	-0.06	1.3	0.74	1.15
MDA-MB-231	0.1	0.14	-0.16	2.17	1.02	1.67
	miR-NC			miR-mimic
MCF-7	1	1.10957	1.04247	0.406126	0.598739	0.450625
MDA-MB-231	0.933033	0.907519	1.11729	0.222211	0.493116	0.314253
