# Supplementary material for: The impact of hsa-miR-1972 on the expression of von Willebrand factor in breast cancer progression regulation
Source: PeerJ journal article supplement (doi:10.7717/peerj.18476), 2024-11-08
Supplement: Figure_8.zip [file Figure_8.zip]

## Sheet: Fig8A, B_PCR
MCF7
ITGB8BP				MAP2K1				NEK1				SHC1				CDH1				MMP9
Vector	miR-mimic+si-VWF	miR-mimic+oe-VWF		Vector	miR-mimic+si-VWF	miR-mimic+oe-VWF		Vector	miR-mimic+si-VWF	miR-mimic+oe-VWF		Vector	miR-mimic+si-VWF	miR-mimic+oe-VWF		Vector	miR-mimic+si-VWF	miR-mimic+oe-VWF		Vector	miR-mimic+si-VWF	miR-mimic+oe-VWF
0	1.73	0.14		0	1.18	0.23		0	0.72	0.49		0	2.11	0.98		0	1.36	0.48		0	2.51	0.07
-0.11	2.31	0.29		-0.14	0.94	-0.09		0.06	0.52	-0.02		0.08	1.94	0.26		-0.14	1.69	0.53		-0.08	1.8	0.62
0.05	2.23	0.31		-0.03	0.97	0.46		0.18	0.11	0.08		-0.15	1.85	0.47		0.02	1.27	0.6		0.07	1.73	0.33
MDA-MB-231
ITGB8BP				MAP2K1				NEK1				SHC1				CDH1				MMP9
Vector	miR-mimic+si-VWF	miR-mimic+oe-VWF		Vector	miR-mimic+si-VWF	miR-mimic+oe-VWF		Vector	miR-mimic+si-VWF	miR-mimic+oe-VWF		Vector	miR-mimic+si-VWF	miR-mimic+oe-VWF		Vector	miR-mimic+si-VWF	miR-mimic+oe-VWF		Vector	miR-mimic+si-VWF	miR-mimic+oe-VWF
0	1.6	0.51		0	2.84	0.76		0	1.27	0.12		0	0.62	0.25		0	1.43	0.79		0	1.36	0.44
-0.03	1.48	0.21		-0.22	1.92	0.41		0.13	1.58	-0.02		-0.18	0.94	-0.03		0.09	1.25	1.08		0.19	1.22	0.24
-0.11	1.27	0.49		0.13	2.09	0.22		-0.13	1.57	-0.36		0.02	0.75	0.92		0.21	1.58	1.38		0.11	1.51	0.32
MCF7
ITGB8BP				MAP2K1				NEK1				SHC1				CDH1				MMP9
Vector	miR-mimic+si-VWF	miR-mimic+oe-VWF		Vector	miR-mimic+si-VWF	miR-mimic+oe-VWF		Vector	miR-mimic+si-VWF	miR-mimic+oe-VWF		Vector	miR-mimic+si-VWF	miR-mimic+oe-VWF		Vector	miR-mimic+si-VWF	miR-mimic+oe-VWF		Vector	miR-mimic+si-VWF	miR-mimic+oe-VWF
1	0.301452	0.907519		1	0.441351	0.852635		1	0.607097	0.712025		1	0.231647	0.50698		1	0.389582	0.716978		1	0.175556	0.952638
1.07923	0.20166	0.817902		1.10191	0.521233	1.06437		0.959264	0.697372	1.01396		0.946058	0.260616	0.835088		1.10191	0.309927	0.692555		1.05702	0.287175	0.650671
0.965936	0.213159	0.806642		1.02101	0.510506	0.726986		0.882703	0.926588	0.946058		1.10957	0.277392	0.721965		0.986233	0.41466	0.659754		0.952638	0.301452	0.795536
MDA-MB-231
ITGB8BP				MAP2K1				NEK1				SHC1				CDH1				MMP9
Vector	miR-mimic+si-VWF	miR-mimic+oe-VWF		Vector	miR-mimic+si-VWF	miR-mimic+oe-VWF		Vector	miR-mimic+si-VWF	miR-mimic+oe-VWF		Vector	miR-mimic+si-VWF	miR-mimic+oe-VWF		Vector	miR-mimic+si-VWF	miR-mimic+oe-VWF		Vector	miR-mimic+si-VWF	miR-mimic+oe-VWF
1	0.329877	0.702222		1	0.139661	0.590496		1	0.41466	0.920188		1	0.650671	0.840896		1	0.371131	0.578344		1	0.389582	0.737135
1.02101	0.358489	0.864537		1.16473	0.264255	0.752623		0.913831	0.334482	1.01396		1.13288	0.521233	1.02101		0.939523	0.420448	0.473029		0.876606	0.429283	0.846745
1.07923	0.41466	0.712025		0.913831	0.234881	0.858565		1.09429	0.336808	1.28343		0.986233	0.594604	0.528509		0.864537	0.334482	0.384219		0.926588	0.351111	0.80107
