# Supplementary material for: The impact of hsa-miR-1972 on the expression of von Willebrand factor in breast cancer progression regulation
Source: PeerJ journal article supplement (doi:10.7717/peerj.18476), 2024-11-08
Supplement: Figure_9.zip [file Figure_9.zip]

## Sheet: Fig9A,B_VEGF
O.D Value	VEGF-A
0.026	0
0.073	31.25
0.116	62.5
0.196	125
0.354	250
0.651	500
1.166	1000
2.055	2000
MCF7				MDA-MB-231
Vector	miR-mimic+si-VWF	miR-mimic+oe-VWF		Vector	miR-mimic+si-VWF	miR-mimic+oe-VWF
0.286	0.089	0.157		0.257	0.082	0.139
0.31	0.116	0.186		0.231	0.108	0.162
0.273	0.097	0.163		0.292	0.098	0.128
MCF7				MDA-MB-231
Vector	miR-mimic+si-VWF	miR-mimic+oe-VWF		Vector	miR-mimic+si-VWF	miR-mimic+oe-VWF
209.028	16.4266	82.9082		180.675	9.58294	65.3101
232.492	42.8237	111.261		155.256	35.0024	87.7965
196.318	24.248	88.7742		214.894	25.2257	54.5558

## Sheet: Fig9A,B_BFGF
O.D Value	Bfgf
0.064	0
0.086	15.63
0.111	31.25
0.171	62.5
0.326	125
0.663	250
1.359	500
2.598	1000
MCF7				MDA-MB-231
Vector	miR-mimic+si-VWF	miR-mimic+oe-VWF		Vector	miR-mimic+si-VWF	miR-mimic+oe-VWF
0.211	0.117	0.141		0.215	0.091	0.139
0.287	0.104	0.157		0.236	0.088	0.094
0.232	0.159	0.148		0.235	0.079	0.087
MCF7				MDA-MB-231
Vector	miR-mimic+si-VWF	miR-mimic+oe-VWF		Vector	miR-mimic+si-VWF	miR-mimic+oe-VWF
69.0449	32.5654	41.8793		70.5972	22.4753	41.1031
98.539	27.5203	48.0886		78.7469	21.311	23.6395
77.1946	48.8647	44.5958		78.3588	17.8183	20.923

## Sheet: Fig9A,B_TGFB
O.D Value	TGF-B
0.025	0
0.035	31.25
0.046	62.5
0.069	125
0.125	250
0.271	500
0.684	1000
1.694	2000
MCF7				MDA-MB-231
Vector	miR-mimic+si-VWF	miR-mimic+oe-VWF		Vector	miR-mimic+si-VWF	miR-mimic+oe-VWF
0.095	0.014	0.037		0.091	0.016	0.025
0.091	0.019	0.083		0.074	0.015	0.035
0.084	0.024	0.061		0.096	0.008	0.043
MCF7				MDA-MB-231
Vector	miR-mimic+si-VWF	miR-mimic+oe-VWF		Vector	miR-mimic+si-VWF	miR-mimic+oe-VWF
171.176	74.9966	102.307		166.426	77.3714	88.058
166.426	80.9336	156.927		146.241	76.184	99.932
158.115	86.8706	130.804		172.363	67.8722	109.431

## Sheet: Fig9A,B_HIF1A
O.D Value	HIF-1a
0.075	0
0.167	23.44
0.25	46.88
0.448	93.75
0.765	187.5
1.244	375
1.94	750
2.453	1500
MCF7				MDA-MB-231
Vector	miR-mimic+si-VWF	miR-mimic+oe-VWF		Vector	miR-mimic+si-VWF	miR-mimic+oe-VWF
0.383	0.305	0.441		0.435	0.274	0.303
0.384	0.312	0.429		0.401	0.293	0.281
0.452	0.323	0.449		0.439	0.309	0.331
MCF7				MDA-MB-231
Vector	miR-mimic+si-VWF	miR-mimic+oe-VWF		Vector	miR-mimic+si-VWF	miR-mimic+oe-VWF
72.0336	28.2694	104.576		101.21	10.8759	27.1472
72.5947	32.197	97.8433		82.1331	21.5364	14.8035
110.748	38.3688	109.065		103.454	30.5137	42.8575

## Sheet: Fig9D_wb
Vector	miR-mimic+si-VWF	miR-mimic+oe-VWF
0.862	0.377	0.512
0.903	0.358	0.439
1.114	0.214	0.556

## Sheet: Fig9F,J_TRANSWELL
MCF-7				MDA-MB-231
Vector	miR-mimic+si-VWF	miR-mimic+oe-VWF		Vector	miR-mimic+si-VWF	miR-mimic+oe-VWF
87	38	51		181	48	61
106	26	58		154	58	76
99	36	63		165	40	82
