# Supplementary material for: The impact of hsa-miR-1972 on the expression of von Willebrand factor in breast cancer progression regulation
Source: PeerJ. 2024 Nov 8;12:e18476. doi: 10.7717/peerj.18476 (PMC11552492; doi:10.7717/peerj.18476)
Supplement: Supplemental Information 9 [file peerj-12-18476-s009.xls]

## Sheet: Sheet1
ITEM TO CHECK	IMPORTANCE	CHECKLIST
EXPERIMENTAL DESIGN
Definition of experimental and control groups	E	page6,line168-174
Number within each group	E	page6,line168-174
Assay carried out by core lab or investigator's lab?	D	Not Applicable
Acknowledgement of authors' contributions	D	Not Applicable
SAMPLE
Description	E	page7,line190-195
Volume/mass of sample processed	D	Not Applicable
Microdissection or macrodissection	E	page7,line190-195
Processing procedure	E	page7,line190-195
If frozen - how and how quickly?	E	page7,line190-195
If fixed - with what, how quickly?	E	page7,line190-195
Sample storage conditions and duration (especially for FFPE samples)	E	page7,line190-195
NUCLEIC ACID EXTRACTION
Procedure and/or instrumentation	E	page7,line190-195
Name of kit and details of any modifications	E	page7,line190-195
Source of additional reagents used	D	Not Applicable
Details of DNase or RNAse treatment	E	page7,line190-195
Contamination assessment (DNA or RNA)	E	page7,line190-195
Nucleic acid quantification	E	page7,line190-195
Instrument and method	E	page7,line190-195
Purity (A260/A280)	D	Not Applicable
Yield	D	Not Applicable
RNA integrity method/instrument	E	page7,line190-195
RIN/RQI or Cq of 3' and 5' transcripts	E	page7,line190-195
Electrophoresis traces	D	Not Applicable
Inhibition testing (Cq dilutions, spike or other)	E	page7,line190-195
REVERSE TRANSCRIPTION
Complete reaction conditions	E	page7,line190-195
Amount of RNA and reaction volume	E	page7,line190-195
Priming oligonucleotide (if using GSP) and concentration	E	page7,line190-195
Reverse transcriptase and concentration	E	page7,line190-195
Temperature and time	E	page7,line190-195
Manufacturer of reagents and catalogue numbers	D	Not Applicable
Cqs with and without RT	D*	Not Applicable
Storage conditions of cDNA	D	Not Applicable
qPCR TARGET INFORMATION
If multiplex, efficiency and LOD of each assay.	E	page7,line190-195
Sequence accession number	E	page7,line190-195
Location of amplicon	D	Not Applicable
Amplicon length	E	page7,line190-195
In silico specificity screen (BLAST, etc)	E	page7,line190-195
Pseudogenes, retropseudogenes or other homologs?	D	Not Applicable
Sequence alignment	D	Not Applicable
Secondary structure analysis of amplicon	D	Not Applicable
Location of each primer by exon or intron (if applicable)	E	page7,line190-195
What splice variants are targeted?	E	page7,line190-195
qPCR OLIGONUCLEOTIDES
Primer sequences	E	page7,line190-195
RTPrimerDB Identification Number	D	Not Applicable
Probe sequences	D**	Not Applicable
Location and identity of any modifications	E	page7,line190-195
Manufacturer of oligonucleotides	D	Not Applicable
Purification method	D	Not Applicable
qPCR PROTOCOL
Complete reaction conditions	E	page7,line190-195
Reaction volume and amount of cDNA/DNA	E	page7,line190-195
Primer, (probe), Mg++ and dNTP concentrations	E	page7,line190-195
Polymerase identity and concentration	E	page7,line190-195
Buffer/kit identity and manufacturer	E	page7,line190-195
Exact chemical constitution of the buffer	D	Not Applicable
Additives (SYBR Green I, DMSO, etc.)	E	page7,line190-195
Manufacturer of plates/tubes and catalog number	D	Not Applicable
Complete thermocycling parameters	E	page7,line190-195
Reaction setup (manual/robotic)	D	Not Applicable
Manufacturer of qPCR instrument	E	page7,line190-195
qPCR VALIDATION
Evidence of optimisation (from gradients)	D	Not Applicable
Specificity (gel, sequence, melt, or digest)	E	page7,line190-195
For SYBR Green I, Cq of the NTC	E	page7,line190-195
Standard curves with slope and y-intercept	E	page7,line190-195
PCR efficiency calculated from slope	E	page7,line190-195
Confidence interval for PCR efficiency or standard error	D	Not Applicable
r2 of standard curve	E	page7,line190-195
Linear dynamic range	E	page7,line190-195
Cq variation at lower limit	E	page7,line190-195
Confidence intervals throughout range	D	Not Applicable
Evidence for limit of detection	E	page7,line190-195
If multiplex, efficiency and LOD of each assay.	E	page7,line190-195
DATA ANALYSIS
qPCR analysis program (source, version)	E	page7,line190-195
Cq method determination	E	page7,line190-195
Outlier identification and disposition	E	page7,line190-195
Results of NTCs	E	page7,line190-195
Justification of number and choice of reference genes	E	page7,line190-195
Description of normalisation method	E	page7,line190-195
Number and concordance of biological replicates	D	Not Applicable
Number and stage (RT or qPCR) of technical replicates	E	page7,line190-195
Repeatability (intra-assay variation)	E	page7,line190-195
Reproducibility (inter-assay variation, %CV)	D	Not Applicable
Power analysis	D	Not Applicable
Statistical methods for result significance	E	page7,line190-195
Software (source, version)	E	page7,line190-195
Cq or raw data submission using RDML	D	Not Applicable
Table 1. MIQE checklist for authors, reviewers and editors. All essential information (E) must be submitted with the manuscript. Desirable
information (D) should be submitted if available. If using primers obtained from RTPrimerDB, information on qPCR target, oligonucleotides,
protocols and validation is available from that source.
*: Assessing the absence of DNA using a no RT assay is essential when first extracting RNA. Once the sample has been validated as
RDNA-free, inclusion of a no-RT control is desirable, but no longer essential.
**: Disclosure of the probe sequence is highly desirable and strongly encouraged. However, since not all commercial pre-designed assay
vendors provide this information, it cannot be an essential requirement. Use of such assays is advised against.
