# Supplementary figures and images for: The impact of hsa-miR-1972 on the expression of von Willebrand factor in breast cancer progression regulation
Source: PeerJ journal article supplement (doi:10.7717/peerj.18476), 2024-11-08

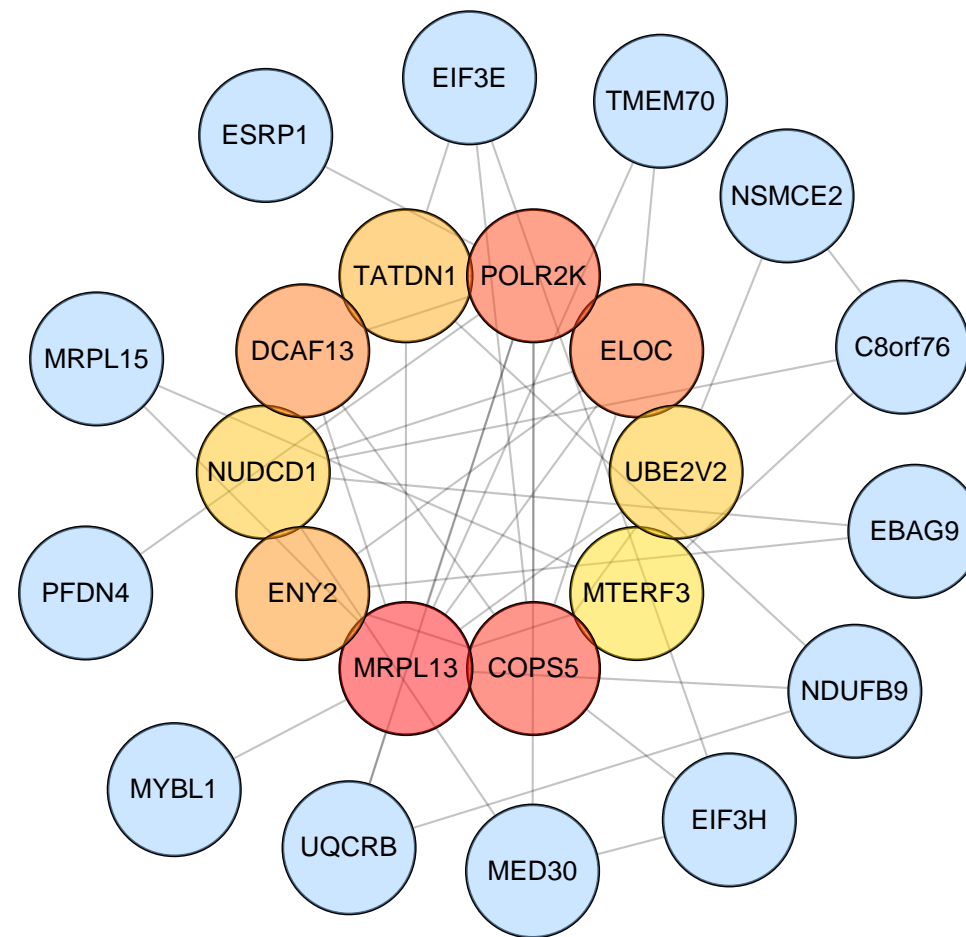

Supplement: DataFig1to3.zip [file DataFig1to3.zip]

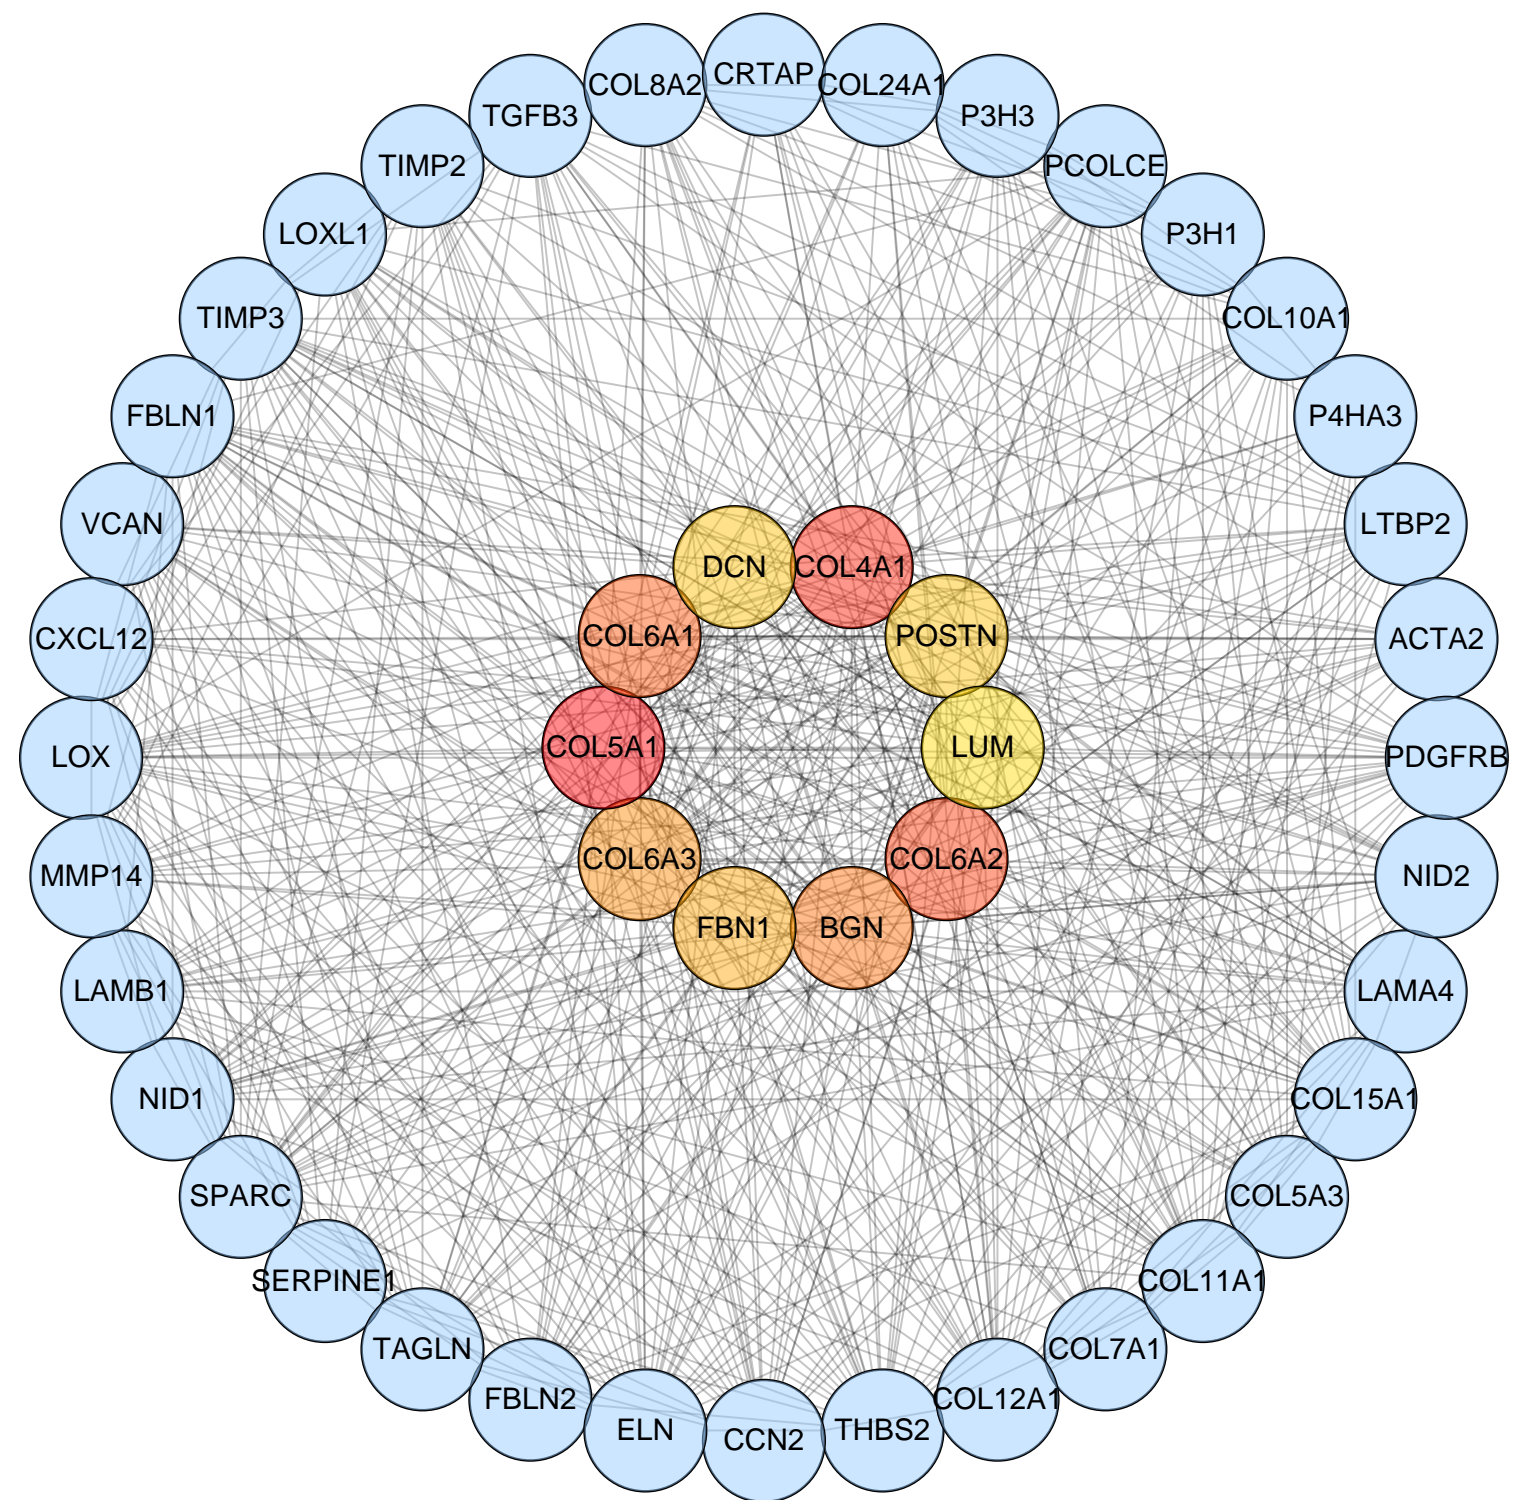

Supplement: DataFig1to3.zip [file DataFig1to3.zip]

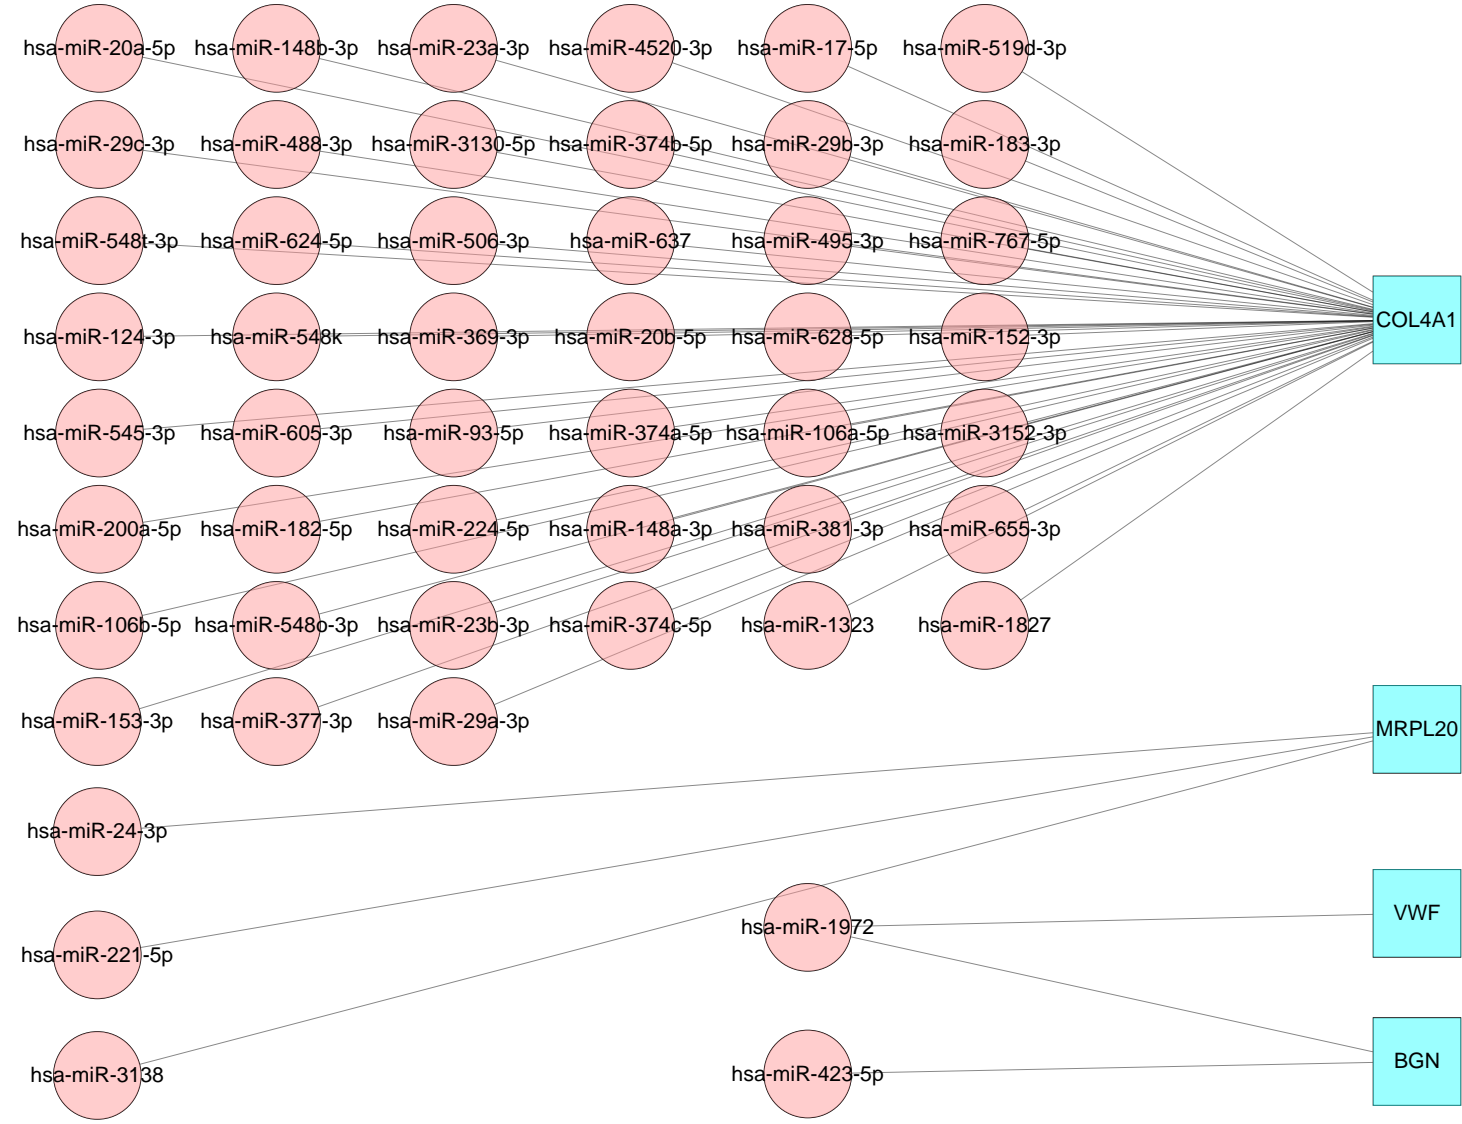

Supplement: DataFig1to3.zip [file DataFig1to3.zip]

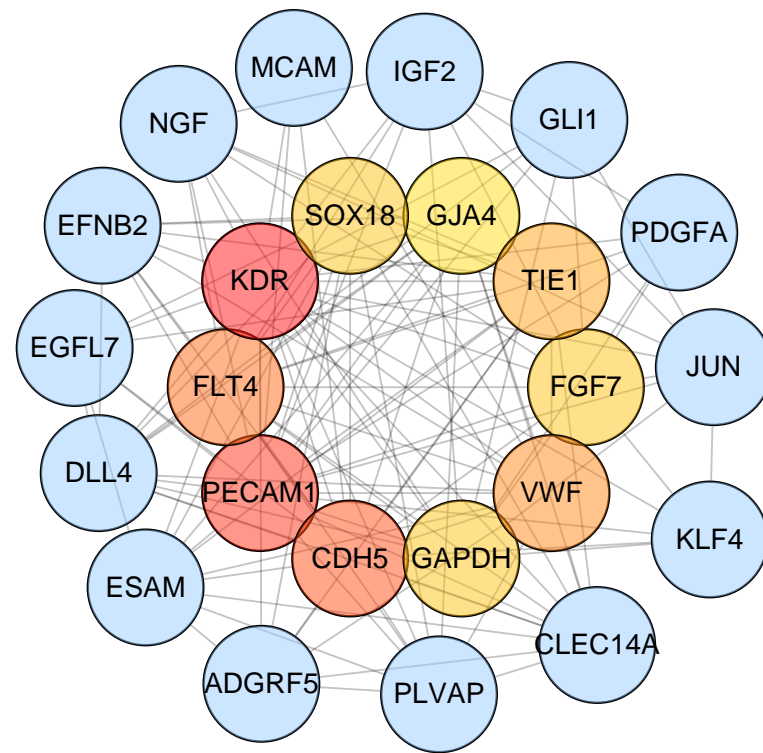

Supplement: DataFig1to3.zip [file DataFig1to3.zip]

drug

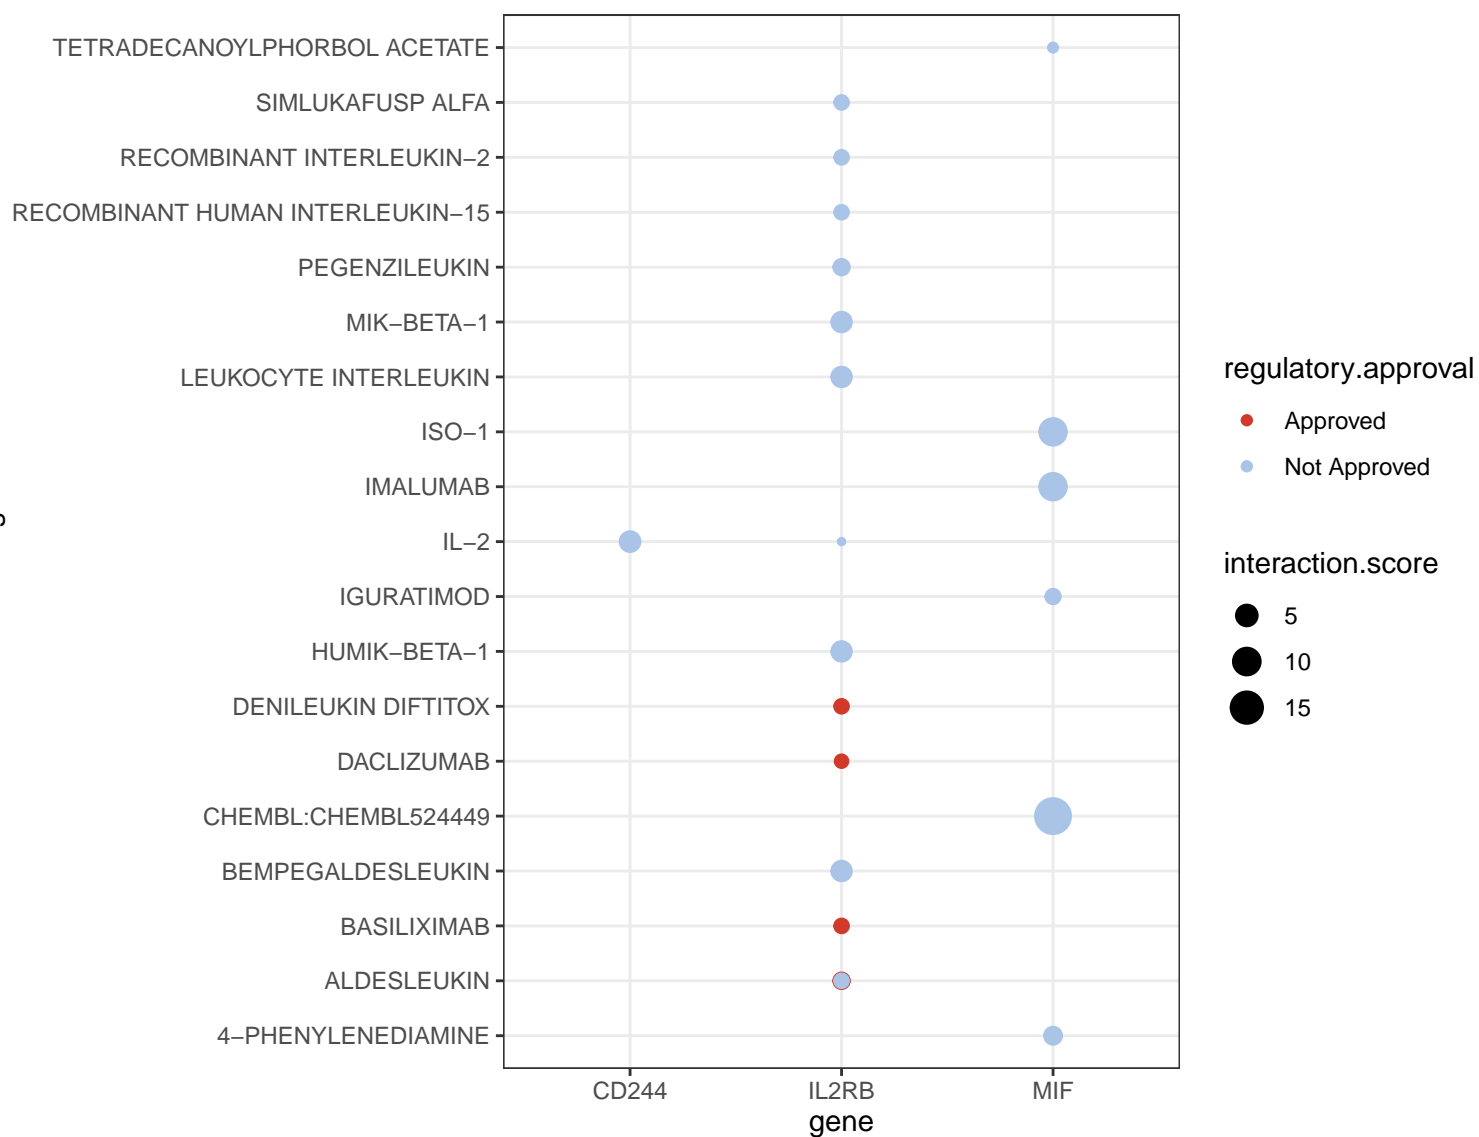

Supplement: DataFig1to3.zip [file DataFig1to3.zip]

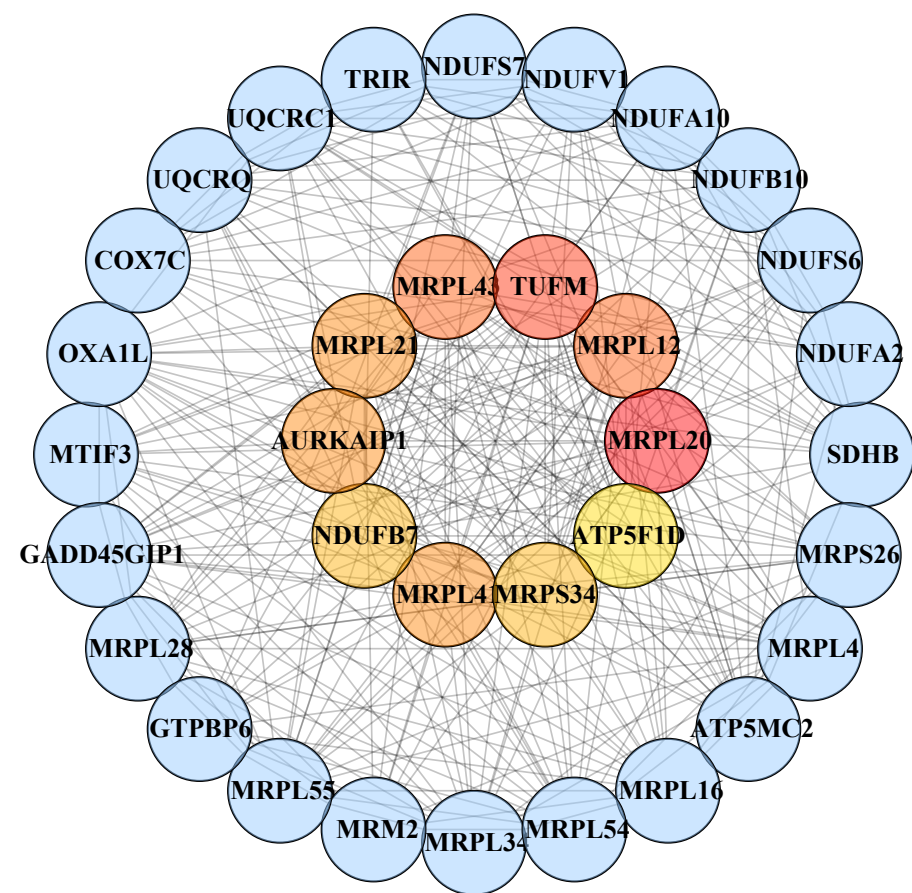

Supplement: DataFig1to3.zip [file DataFig1to3.zip]

**A**

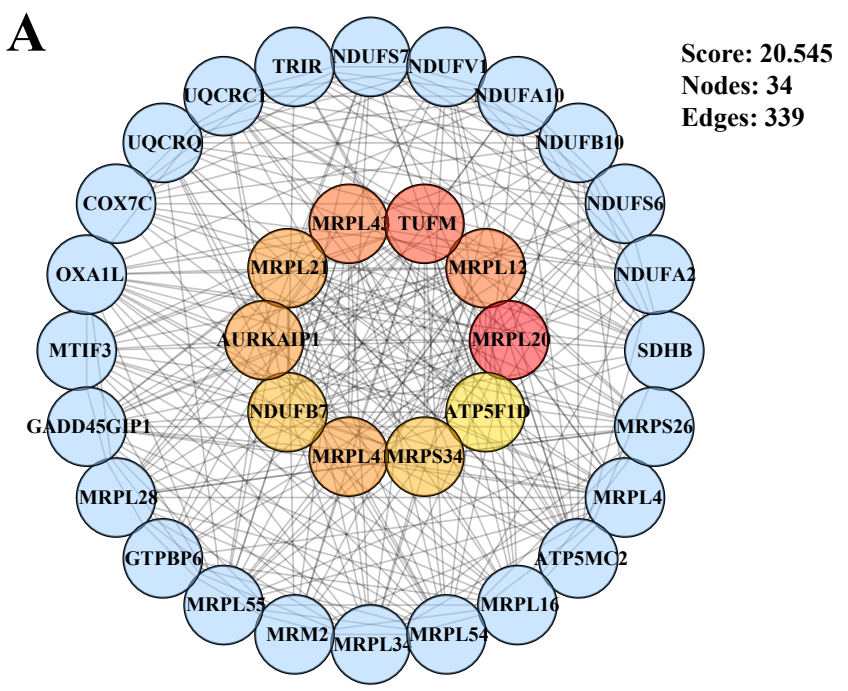

MEblue hub genes

**B**

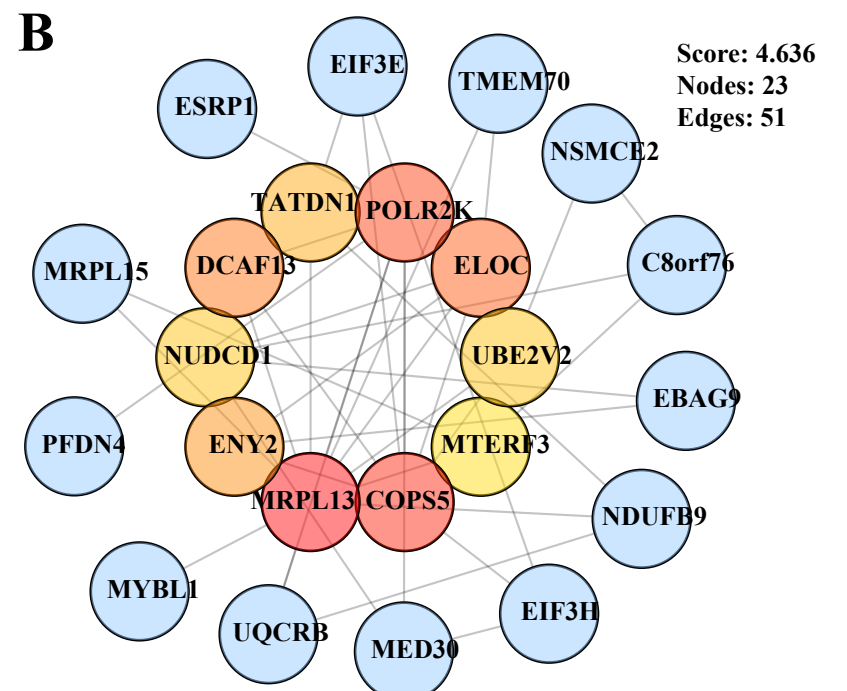

MEflorawhite hub genes

**C**

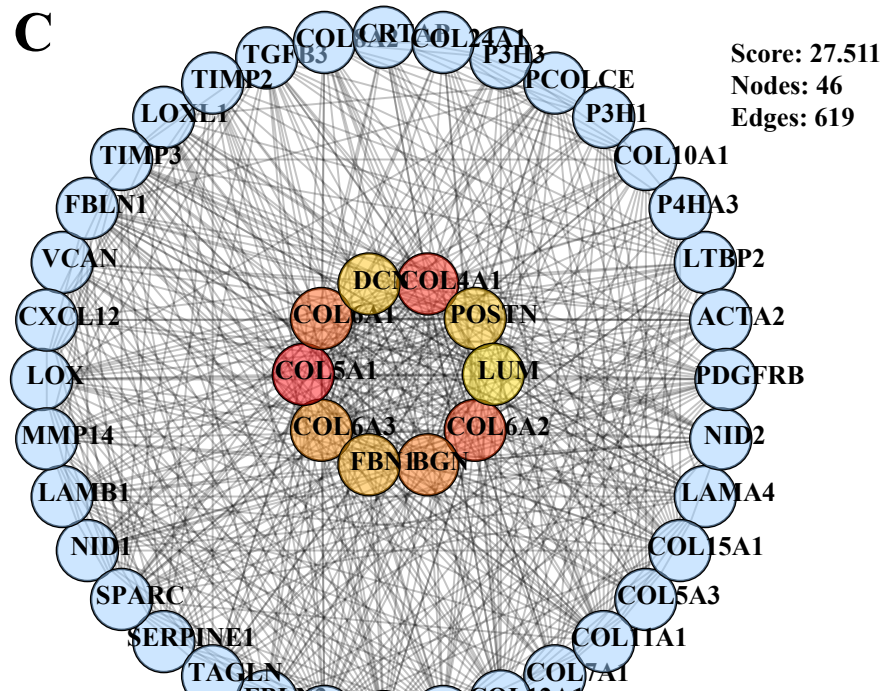

MEmagenta hub genes

**D**

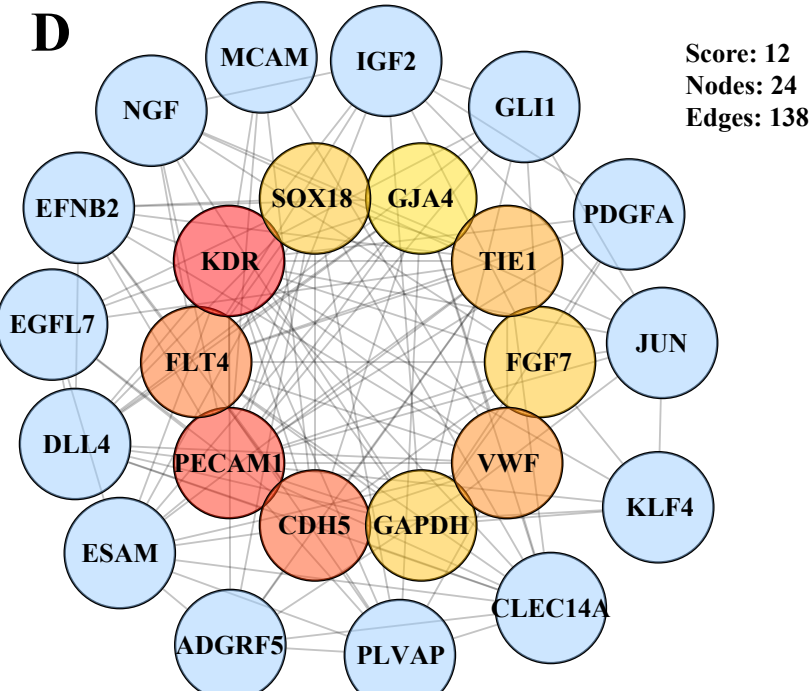

MEpink hub genes

**E**

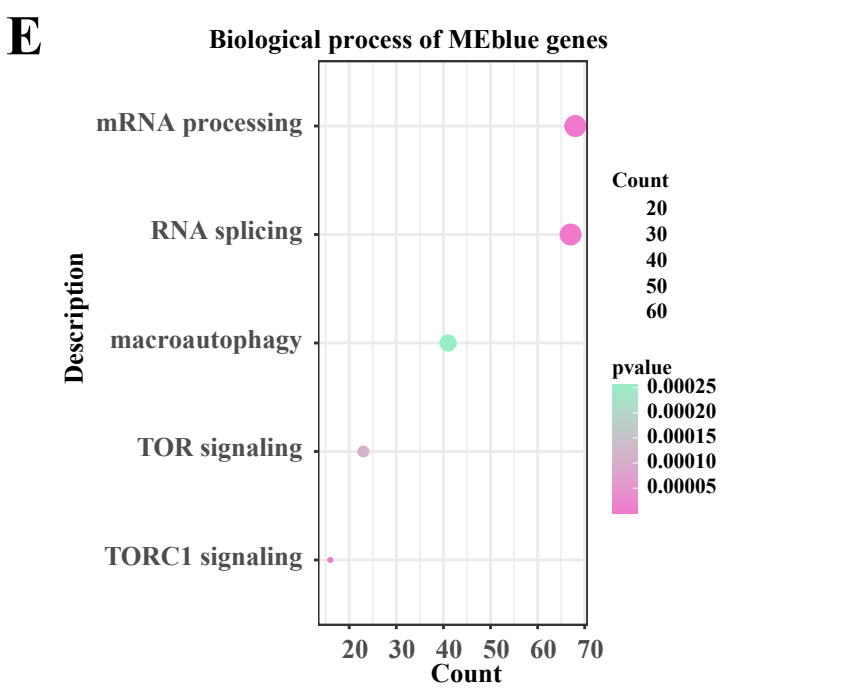

**F**

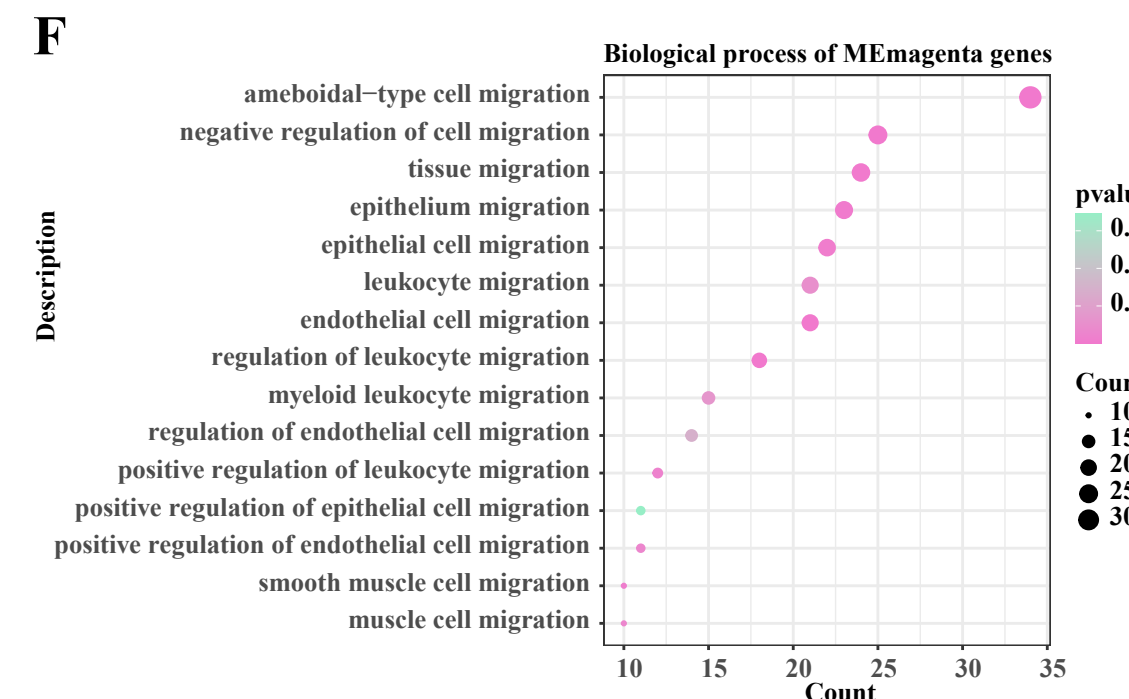

**G**

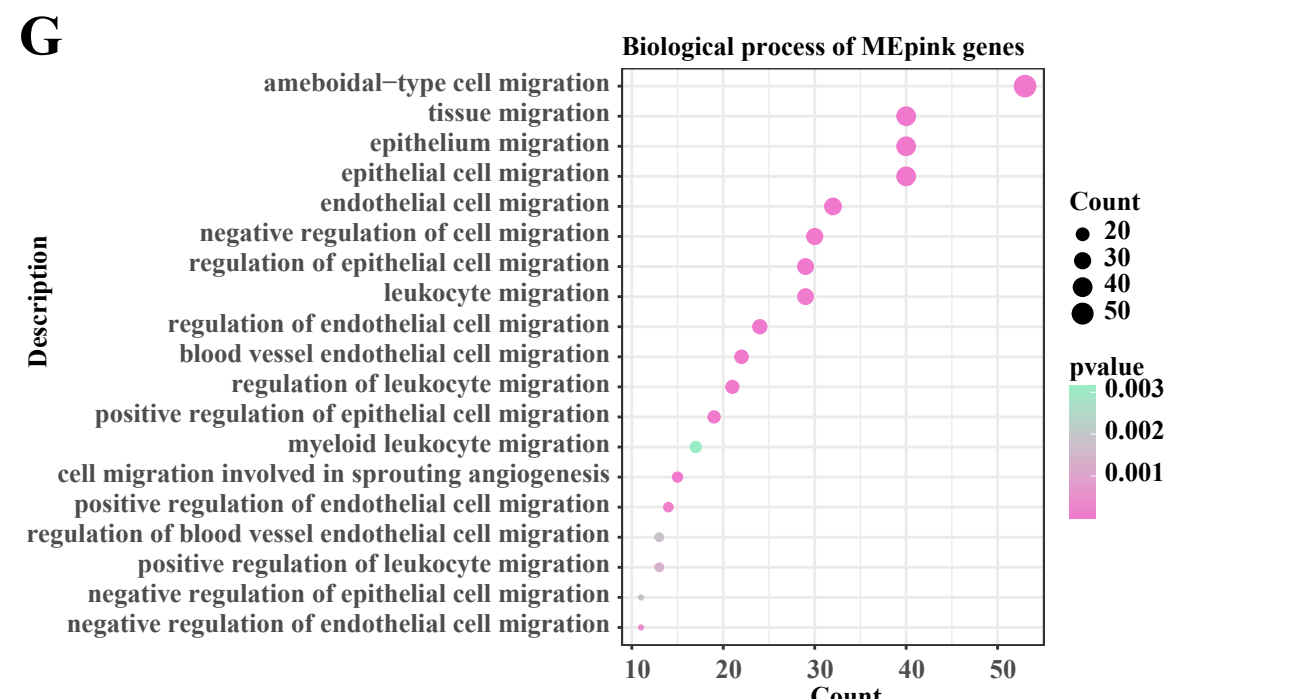

Supplement: DataFig1to3.zip [file DataFig1to3.zip]

**A**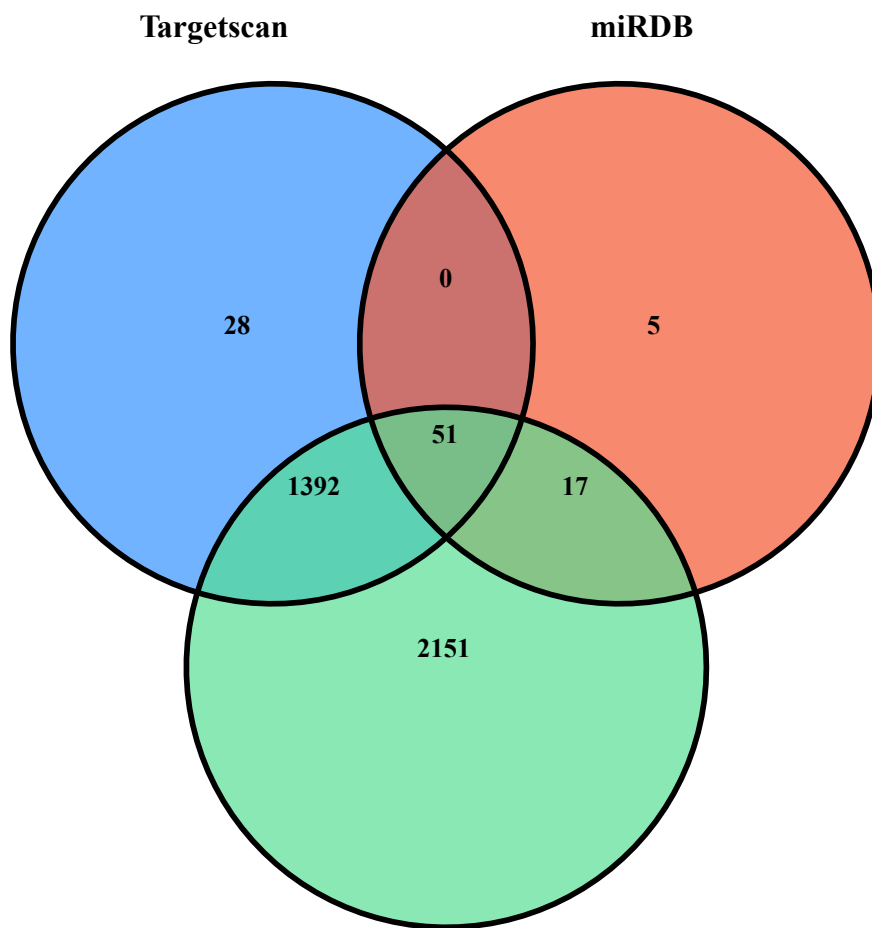**B**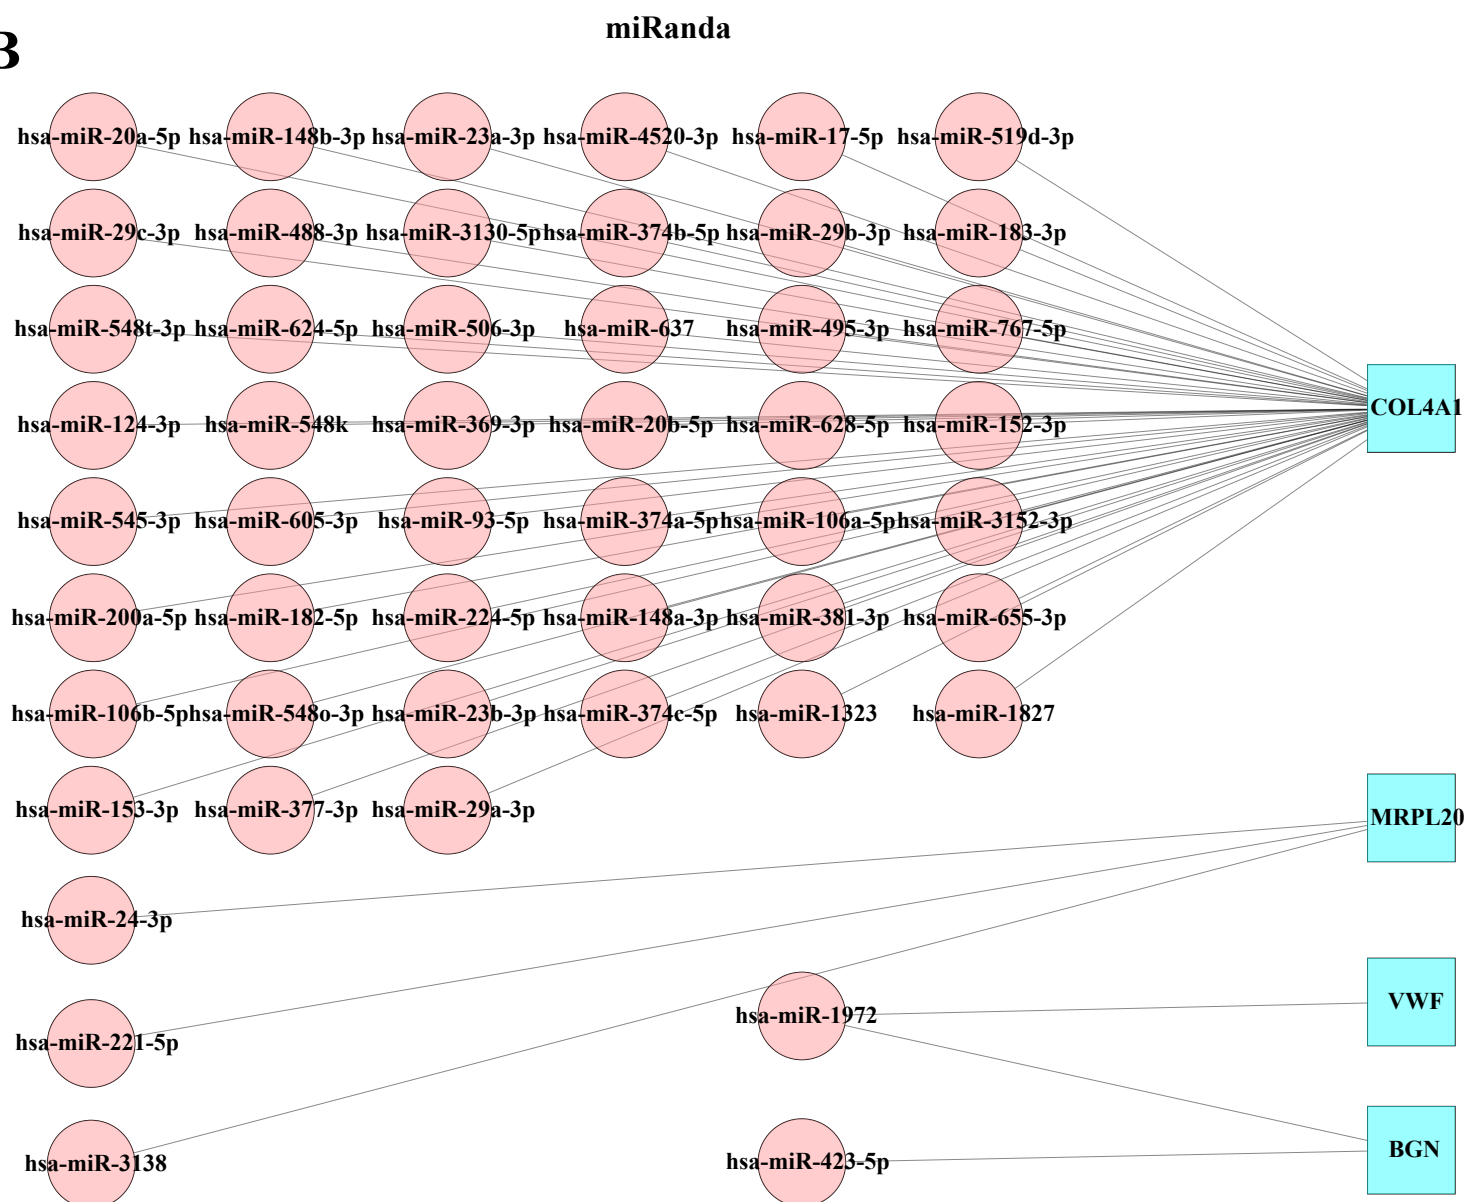

Supplement: DataFig1to3.zip [file DataFig1to3.zip]

# Biological process of MEmagenta genes

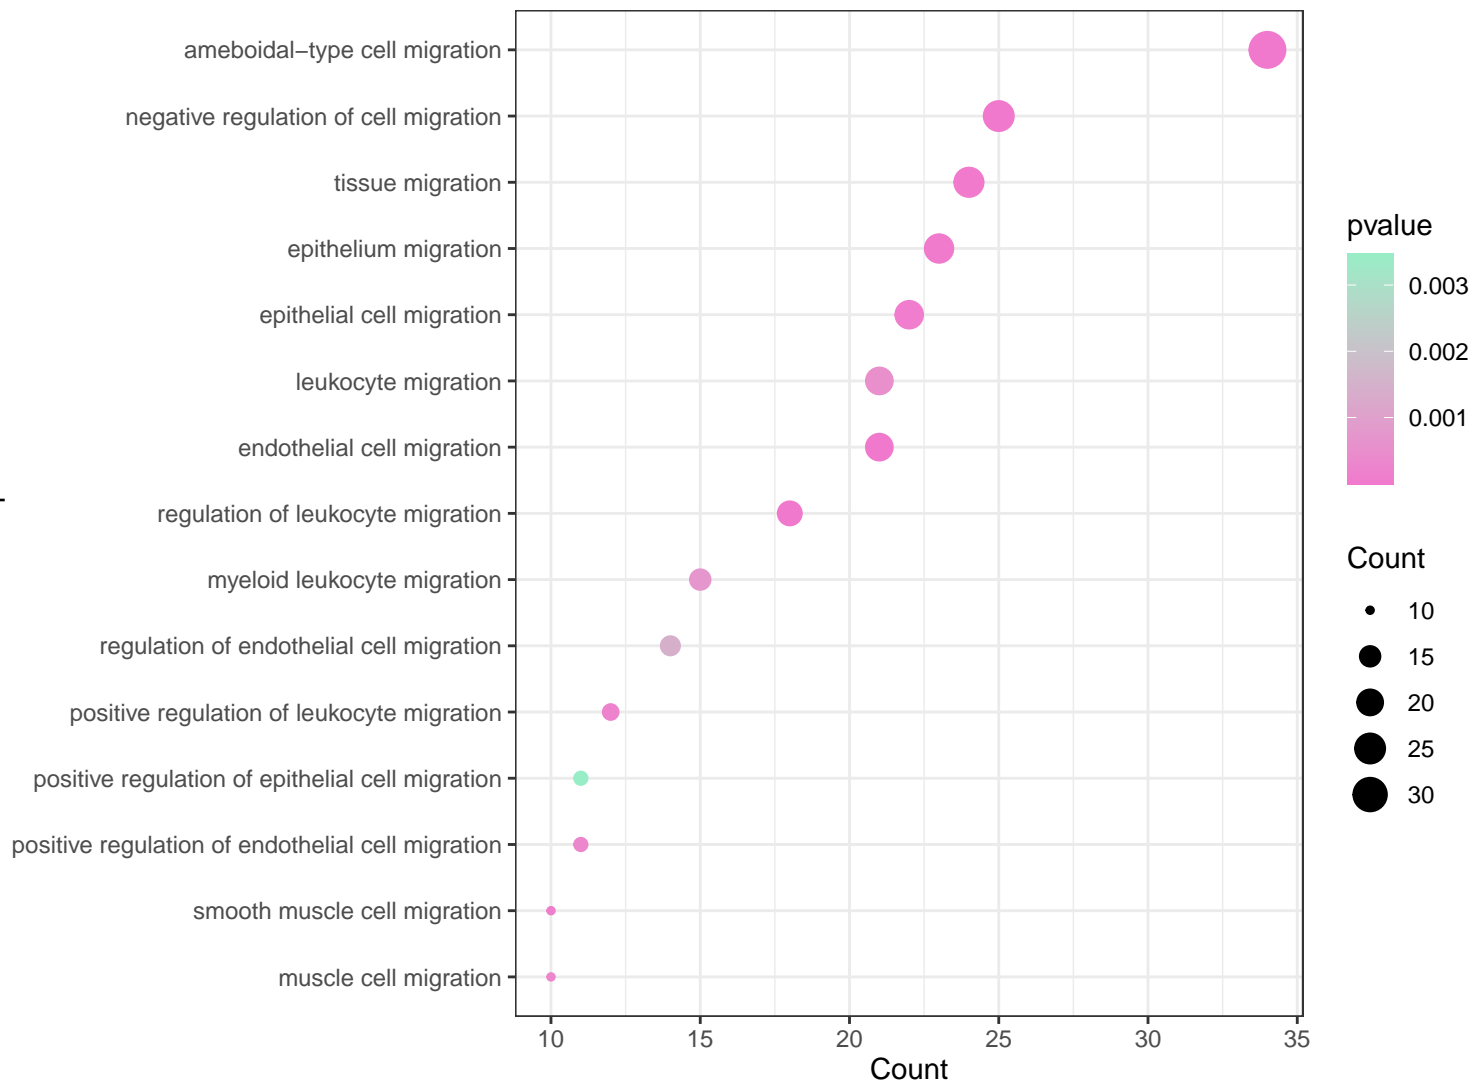

Supplement: DataFig1to3.zip [file DataFig1to3.zip]

# Biological process of MEpink genes

Description

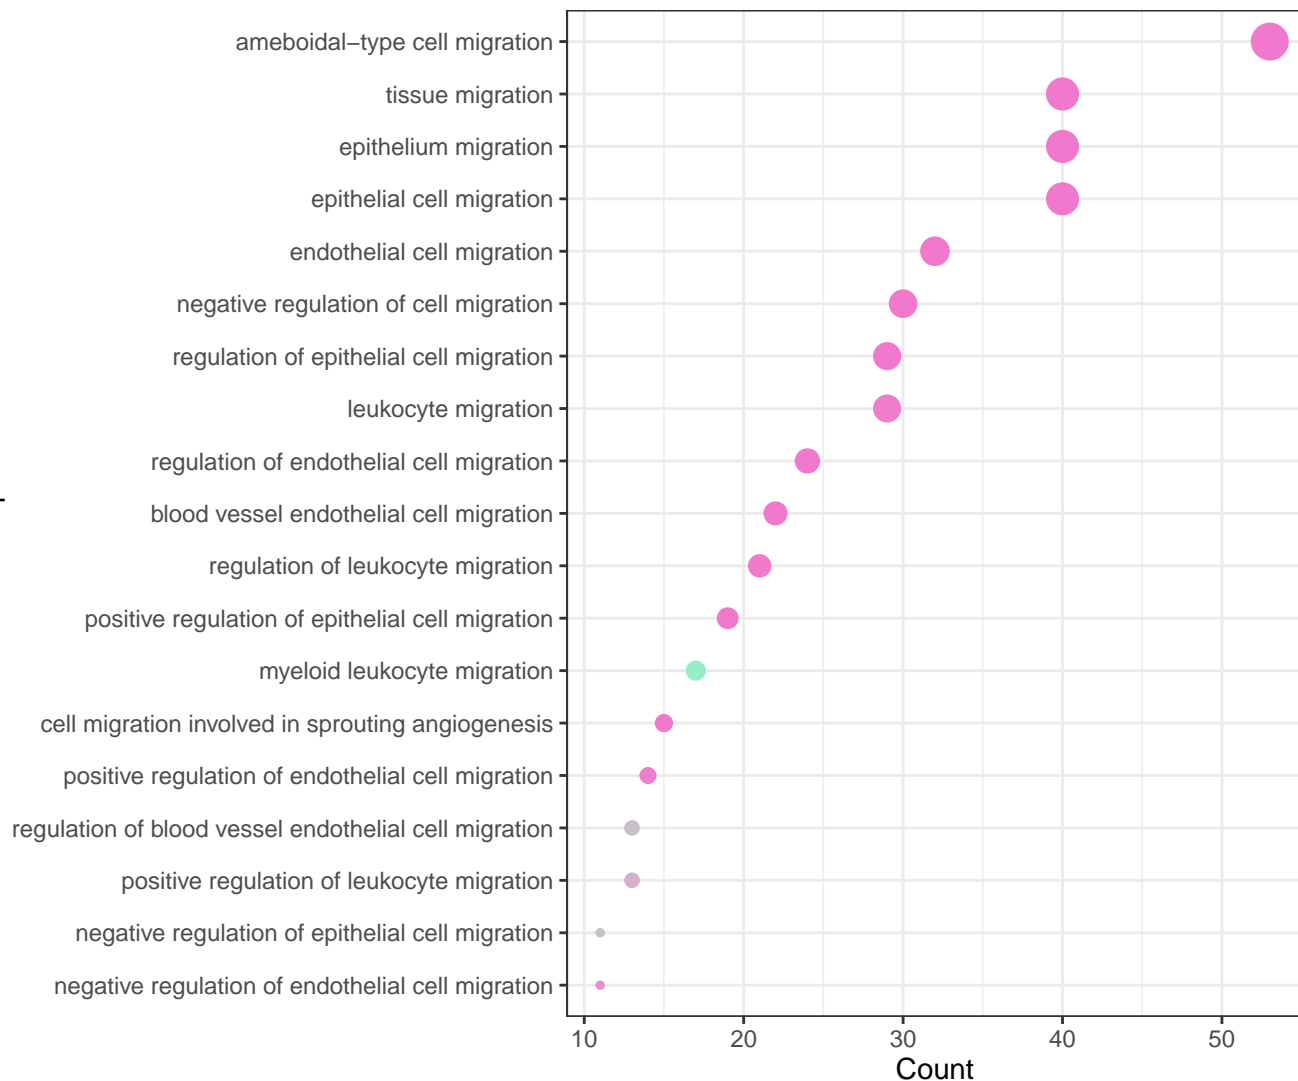

Count

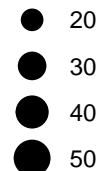

pvalue

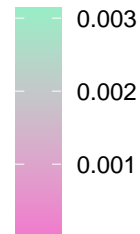

Supplement: DataFig1to3.zip [file DataFig1to3.zip]

Targetscan

miRDB

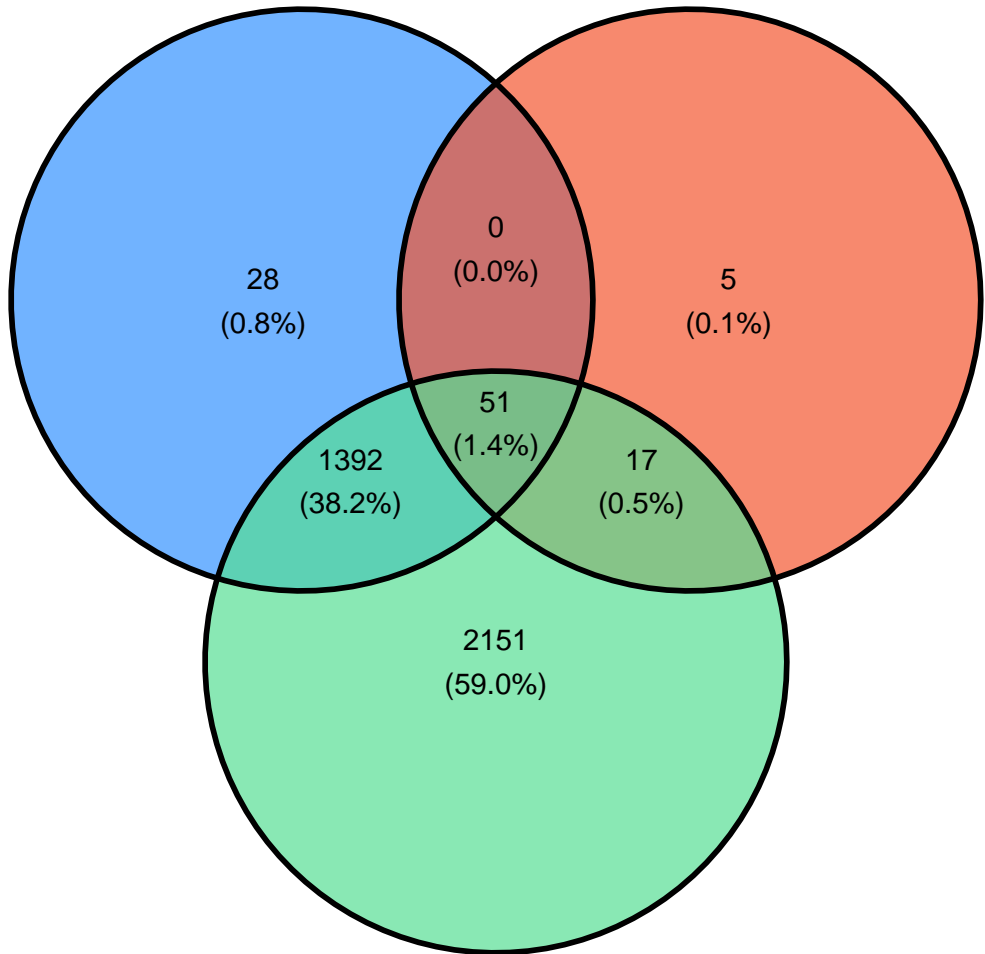

miRanda

Supplement: DataFig1to3.zip [file DataFig1to3.zip]

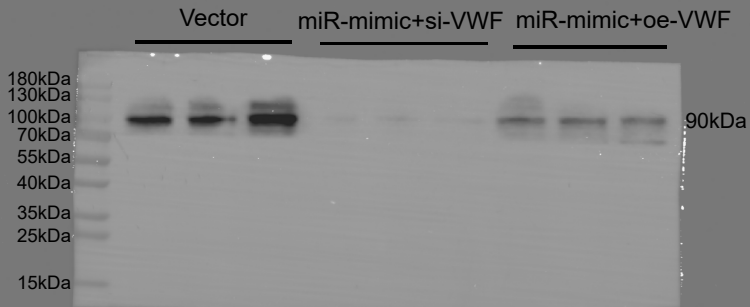

Supplement: Figure_6_raw_data.zip [file Figure_6_raw_data.zip]

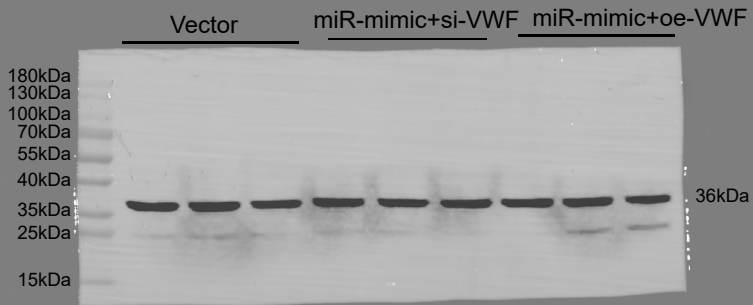

Supplement: Figure_6_raw_data.zip [file Figure_6_raw_data.zip]
